# Supplementary material for: Characterization of Glycolytic Enzymes and Pyruvate Kinase M2 in Type 1 and 2 Diabetic Nephropathy
Source: Oxford University Press journal article supplement (doi:10.2337/dc18-2585), 2019-05-10

## SUPPLEMENTARY DATA

Supplementary Table S1. Antibodies for immunoblotting (Western blot).

| <b>Enzyme</b>  | <b>Catalog number</b> | <b>Dilution</b> | <b>Provider</b>                        |
|----------------|-----------------------|-----------------|----------------------------------------|
| PKM1           | 7067                  | 1:1,000         | Cell Signaling Technology, Beverly, MA |
| PKM2           | 4053                  | 1:1,000         | Cell Signaling Technology, Beverly, MA |
| GAPDH          | sc-48166              | 1:1,000         | Santa Cruz Biotechnology, Dallas, TX   |
| TPI1           | 31470                 | 1:1,000         | Novus Biologicals, Littleton, CO       |
| ENO1           | ab155102              | 1:1,000         | Abcam, Cambridge, MA                   |
| AR             | ab71405               | 1:100           | Abcam, Cambridge, MA                   |
| GLO1           | MA1-13029             | 1:1,000         | Thermo Fisher Scientific, Waltham, MA  |
| MT-CO2         | ab79393               | 1:5,000         | Abcam, Cambridge, MA                   |
| $\beta$ -actin | sc-1616 HRP           | 1:1,000         | Santa Cruz Biotechnology, Dallas, TX   |

Bio-Rad Mini-PROTEAN TGX (Bio-Rad Laboratories, Hercules, CA) precast gels were used for all the western blotting. ImageJ software was applied to quantify the amounts of protein in the western blotting.

SUPPLEMENTARY DATA

Supplementary Table S2. Clinical characteristics of non-Medalist subjects with WB of glomeruli in recovered kidneys.

| Characteristic                                      | Non-DM<br>Subjects<br>N=5 | T2D<br>N=19             | T1D<br>N=15             | P-<br>value |
|-----------------------------------------------------|---------------------------|-------------------------|-------------------------|-------------|
| Gender (M/F)                                        | 2/3                       | 13/6                    | 10/5                    | 0.70        |
| Age (years)                                         | 63 (63, 74)               | 63.0 (54.0, 67.0)       | 67 (45, 80)             | 0.61        |
| Duration (years)                                    | na                        | 10.0 (4.0, 15.0)        | 50 (26, 63)             | <0.001      |
| Height (cm)                                         | 163.2 (160.0,<br>167.6)   | 170.2 (165.0,<br>173.0) | 170.2 (164.0,<br>182.9) | 0.32        |
| Weight (kg)                                         | 65.8 (52.2, 79.8)         | 84.0 (69.0, 93.0)       | 77.1 (69.0, 97.5)       | 0.20        |
| BMI (kg/m <sup>2</sup> )                            | 22.1 (20.4, 30.0)         | 28.2 (25.3, 31.5)       | 26.5 (23.3, 32.3)       | 0.34        |
| eGFR (ml/min/1.73m <sup>2</sup> )                   | 69.6 (60.1, 95.6)         | 40.0 (14.9, 58.5)       | 24.6 (13.6, 76.2)       | 0.23        |
| Renal function by eGFR*                             |                           |                         |                         |             |
| eGFR High group<br>(≥30 ml/min/1.73m <sup>2</sup> ) | 3                         | 12                      | 6                       | -           |
| eGFR Low group<br>(<30 ml/min/1.73m <sup>2</sup> )  | 0                         | 7                       | 8                       | -           |
| Renal histology†                                    |                           |                         |                         |             |
| DN class no to mild (0-IIA)                         | 4                         | 14                      | 6                       | -           |
| DN class moderate to severe<br>(IIB-IV)             | 0                         | 5                       | 8                       | -           |

Median (25<sup>th</sup> -75<sup>th</sup> percentile range) or n. P-values (Anova) show the difference between the groups (Non-DM Subjects, T2D, T1D). na; not applicable. eGFR; estimated glomerular filtration rate. DN Class; Histological classification of DN by Taervart et al [ref ]. \*Data missing on two non-DM subjects. †Data missing on one individual with T1D and one non-DM subject.

SUPPLEMENTARY DATA

Supplementary Table S3. Clinical characteristics of Joslin Medalists for SOMAscan analysis.

| Clinical Characteristics           | Overall Cohort<br>N=1008 | SOMAscan<br>Yes (N=180) | SOMAscan<br>No (N=828) | P-value |
|------------------------------------|--------------------------|-------------------------|------------------------|---------|
| Male, %                            | 46                       | 50                      | 45                     | 0.24    |
| Age (Years)                        | 65.8±7.6                 | 66.8 ±7.5               | 65.6±7.6               | 0.06    |
| Duration (Years)                   | 54.7±5.7                 | 55.4±6.2                | 54.5±5.6               | 0.05    |
| BMI (kg/m <sup>2</sup> )           | 26.2±4.7                 | 27.2±5.2                | 25.9±4.6               | 0.002   |
| Insulin dose (units/kg)            | 0.46±0.17                | 0.46±0.2                | 0.46±0.2               | 0.76    |
| HbA <sub>1c</sub> (%)              | 7.2±1.0                  | 7.5±0.9                 | 7.1±1.0                | <.001   |
| HbA <sub>1c</sub> (mmol/mol)       | 55.1±10.51               | 58.2±9.6                | 54.4±10.6              | <.001   |
| Total cholesterol (mg/dl)          | 161.5±32.8               | 161.4±34.88             | 161.5±32.3             | 0.95    |
| LDL cholesterol (mg/dl)            | 81.0±23.8                | 82.5±25.3               | 80.7±23.49             | 0.35    |
| HDL cholesterol (mg/dl)            | 65.3±19.9                | 62.4±21.6               | 66.0±19.5              | 0.03    |
| Triglycerides (mg/dl)              | 74.7±37.2                | 82.5±44.2               | 73.0±35.3              | 0.002   |
| eGFR (ml/min/1.73 m <sup>2</sup> ) | 69.8±20.2                | 58.2±24.2               | 72.4±18.3              | <.001   |
| ACR (ug/mg)                        | 12.1 (6.8-33.9)          | 13.4 (8.0-48.9)         | 11.9 (6.2-31)          | 0.01    |
| Systolic BP (mmHg)                 | 132.2±16.9               | 132.3±17.4              | 132.2±16.8             | 0.94    |
| Diastolic BP (mmHg)                | 64.2±8.5                 | 63.3±8.4                | 64.37±8.6              | 0.13    |
| CVD, %                             | 40                       | 50                      | 38                     | 0.002   |
| PDR, %                             | 53                       | 62                      | 51                     | 0.02    |
| Neuropathy (MNSI≥2), %             | 70                       | 74                      | 69                     | 0.16    |
| Detectable c-peptide, %            | 33                       | 42                      | 31                     | 0.003   |
| Hypertensive Medication, %         | 65                       | 70                      | 64                     | 0.13    |
| Lipid lowering medication, %       | 70                       | 73                      | 69                     | 0.22    |
| Exercise, %                        | 80                       | 74                      | 81                     | 0.03    |

Data are mean±SD or median (IQR) for continuous variables or % for categorical variables where noted. P-values between those with and without SOMAscan data. eGFR; estimated glomerular filtration rate, ACR; albumin-to-creatinine ratio; BP; blood pressure, CVD cardiovascular disease, PDR; proliferative diabetic retinopathy.

## SUPPLEMENTARY DATA

Supplementary Table S4. Replication of enzymes in CKD-protected Medalists plasma (SOMAscan).

| <b>Protein</b>                           | <b>NoCKDvsCKD.p</b> | <b>NoCKDvsCKD.FC</b> | <b>Enzyme</b> |
|------------------------------------------|---------------------|----------------------|---------------|
| Pyruvate kinase M2                       | 0.000669            | 1.52                 | PKM2          |
| Isoform 1 of Triosephosphate isomerase   | 0.00128             | 1.31                 | TPI1          |
| L-lactate dehydrogenase B chain          | 0.00625             | 1.16                 | LDHB          |
| Phosphoglycerate mutase 1                | 0.0011              | 2.37                 | PGAM1         |
| Cytochrome C                             | 0.146               | 1.06                 | Cytochrome C  |
| Glyceraldehyde-3-phosphate dehydrogenase | 0.392               | 1.18                 | GAPDH         |

FC: Fold change. 6/14 enzymes part of the glycolysis, glucose metabolism and TCA pathways earlier identified in protected Medalists glomeruli were part of the SOMAscan platform and specifically analyzed. CKD refers to Chronic kidney Disease Stage 3b, as defined by  $eGFR < 45 \text{ ml/min/1.73 m}^2$ .

SUPPLEMENTARY DATA

Supplementary Table S5. Up-regulated proteins (FDR<0.05) in the plasma from Joslin Medalists who were CKD Protected vs. Non-protected (SOMAscan) – unadjusted and adjusted analyses.

| Target                           | Target full name                                                               | Unadjusted |          |          | Adjusted* |          |          |
|----------------------------------|--------------------------------------------------------------------------------|------------|----------|----------|-----------|----------|----------|
|                                  |                                                                                | FC         | p        | FDR      | FC        | p        | FDR      |
| Testican-2                       | Testican-2                                                                     | 1.37       | 3.88E-16 | 1.75E-14 | 1.28      | 5.44E-08 | 1.2E-06  |
| ON                               | SPARC                                                                          | 1.5        | 1.56E-07 | 2.21E-06 | 1.71      | 1E-08    | 2.75E-07 |
| DUS3                             | Dual specificity protein phosphatase 3                                         | 1.6        | 1.96E-07 | 2.66E-06 | 1.69      | 5.03E-07 | 7.48E-06 |
| Cathepsin V                      | Cathepsin L2                                                                   | 1.29       | 4.85E-07 | 5.88E-06 | 1.2       | 0.00205  | 0.00807  |
| LGMN                             | Legumain                                                                       | 1.16       | 1.03E-06 | 1.17E-05 | 1.18      | 9.04E-06 | 8.72E-05 |
| ERBB1                            | Epidermal growth factor receptor                                               | 1.15       | 1.38E-06 | 1.54E-05 | 1.07      | 0.0341   | 0.0871   |
| SGTA                             | Small glutamine-rich tetratricopeptide repeat-containing protein alpha         | 1.69       | 1.39E-06 | 1.54E-05 | 1.72      | 1.09E-05 | 0.000103 |
| Mammaglobin 2                    | Mammaglobin-B                                                                  | 1.14       | 1.92E-06 | 2.08E-05 | 1.19      | 2.09E-07 | 3.63E-06 |
| TWEAK                            | Tumor necrosis factor ligand superfamily member 12                             | 1.14       | 2.14E-06 | 2.26E-05 | 1.13      | 0.000217 | 0.00127  |
| Apo D                            | Apolipoprotein D                                                               | 1.14       | 2.29E-06 | 2.39E-05 | 1.16      | 0.000023 | 0.000187 |
| amyloid precursor protein        | Amyloid beta A4 protein                                                        | 1.4        | 3.81E-06 | 3.81E-05 | 1.6       | 1.03E-07 | 2.01E-06 |
| Glutamate carboxypeptidase       | Cytosolic non-specific dipeptidase                                             | 1.26       | 5.69E-06 | 5.44E-05 | 1.32      | 1.11E-05 | 0.000104 |
| PDE11                            | Dual 3',5'-cyclic-AMP and -GMP phosphodiesterase 11A                           | 1.4        | 5.81E-06 | 5.46E-05 | 1.57      | 1.27E-07 | 2.38E-06 |
| 6-Phosphogluconate dehydrogenase | 6-phosphogluconate dehydrogenase, decarboxylating                              | 1.94       | 8.21E-06 | 7.54E-05 | 1.75      | 0.000997 | 0.00446  |
| Cathepsin A                      | Lysosomal protective protein                                                   | 1.27       | 8.44E-06 | 7.69E-05 | 1.36      | 9.51E-06 | 0.000091 |
| C1QBP                            | Complement component 1 Q subcomponent-binding protein, mitochondrial           | 1.1        | 8.52E-06 | 0.000077 | 1.14      | 1.72E-06 | 2.25E-05 |
| SRCN1                            | Proto-oncogene tyrosine-protein kinase Src                                     | 2.08       | 9.23E-06 | 8.27E-05 | 2.03      | 0.000334 | 0.00181  |
| NCC27                            | Chloride intracellular channel protein 1                                       | 1.66       | 1.07E-05 | 9.48E-05 | 2.01      | 2.36E-07 | 3.98E-06 |
| BAFF Receptor                    | Tumor necrosis factor receptor superfamily member 13C                          | 1.23       | 1.18E-05 | 0.000104 | 1.21      | 0.000845 | 0.00396  |
| kallikrein 14                    | Kallikrein-14                                                                  | 1.15       | 1.21E-05 | 0.000105 | 1.14      | 0.000447 | 0.00237  |
| PK3CG                            | Phosphatidylinositol 4,5-bisphosphate 3-kinase catalytic subunit gamma isoform | 1.18       | 1.28E-05 | 0.00011  | 1.2       | 7.19E-05 | 0.000507 |
| PKB a/b/g                        | RAC-alpha/beta/gamma serine/threonine-protein kinase                           | 1.42       | 0.000013 | 0.000111 | 1.63      | 1.21E-07 | 2.31E-06 |
| P-Selectin                       | P-selectin                                                                     | 1.22       | 0.000014 | 0.000119 | 1.3       | 1.93E-06 | 2.48E-05 |
| Glypican 3                       | Glypican-3                                                                     | 1.31       | 1.62E-05 | 0.000135 | 1.13      | 0.0496   | 0.117    |
| MAPKAPK3                         | MAP kinase-activated protein kinase 3                                          | 1.36       | 1.83E-05 | 0.000151 | 1.49      | 6.63E-06 | 6.93E-05 |
| MIF                              | Macrophage migration inhibitory factor                                         | 1.23       | 1.92E-05 | 0.000157 | 1.34      | 2.73E-06 | 3.33E-05 |

SUPPLEMENTARY DATA

|                                 |                                                                   |      |          |          |      |          |          |
|---------------------------------|-------------------------------------------------------------------|------|----------|----------|------|----------|----------|
| TEC                             | Tyrosine-protein kinase Tec                                       | 1.43 | 2.13E-05 | 0.000172 | 1.69 | 1.8E-07  | 3.28E-06 |
| GPVI                            | Platelet glycoprotein VI                                          | 1.36 | 3.12E-05 | 0.000248 | 1.61 | 9.48E-08 | 1.88E-06 |
| Soggy-1                         | Dickkopf-like protein 1                                           | 1.2  | 0.000037 | 0.000292 | 1.22 | 0.000252 | 0.00141  |
| Cytochrome P450 3A4             | Cytochrome P450 3A4                                               | 1.36 | 5.07E-05 | 0.000395 | 1.6  | 1.85E-07 | 3.31E-06 |
| GSK-3 alpha/beta                | Glycogen synthase kinase-3 alpha/beta                             | 1.56 | 5.13E-05 | 0.000397 | 1.77 | 7.28E-06 | 7.47E-05 |
| NID2                            | Nidogen-2                                                         | 1.13 | 7.18E-05 | 0.000552 | 1.18 | 1.97E-05 | 0.000165 |
| Protein disulfide isomerase A3  | Protein disulfide-isomerase A3                                    | 1.28 | 8.05E-05 | 0.000614 | 1.46 | 4.54E-07 | 6.92E-06 |
| 14-3-3                          | 14-3-3 protein family                                             | 1.34 | 8.49E-05 | 0.000639 | 1.57 | 3.59E-07 | 5.71E-06 |
| Mn SOD                          | Superoxide dismutase [Mn], mitochondrial                          | 1.15 | 8.87E-05 | 0.000664 | 1.08 | 0.0444   | 0.106    |
| NMT1                            | Glycylpeptide N-tetradecanoyltransferase 1                        | 1.34 | 9.52E-05 | 0.000707 | 1.56 | 1.06E-06 | 0.000015 |
| AIF1                            | Allograft inflammatory factor 1                                   | 1.15 | 0.000116 | 0.000849 | 1.23 | 4.99E-07 | 7.48E-06 |
| Calcineurin B a                 | Calcineurin subunit B type 1                                      | 1.16 | 0.000128 | 0.00093  | 1.17 | 0.000514 | 0.00264  |
| cGMP-stimulated PDE             | cGMP-dependent 3',5'-cyclic phosphodiesterase                     | 1.15 | 0.000138 | 0.001    | 1.17 | 0.000538 | 0.00271  |
| MAPK14                          | Mitogen-activated protein kinase 14                               | 1.3  | 0.00014  | 0.00101  | 1.52 | 3.52E-07 | 5.68E-06 |
| Carbonic anhydrase XIII         | Carbonic anhydrase 13                                             | 1.61 | 0.000146 | 0.00104  | 1.62 | 0.00118  | 0.00506  |
| HSP 90a/b                       | Heat shock protein HSP 90-alpha/beta                              | 1.28 | 0.000147 | 0.00104  | 1.44 | 1.32E-06 | 1.82E-05 |
| Angiopoietin-1                  | Angiopoietin-1                                                    | 1.24 | 0.000192 | 0.00132  | 1.31 | 3.97E-05 | 0.000297 |
| DBNL                            | Drebrin-like protein                                              | 1.24 | 0.000194 | 0.00132  | 1.36 | 2.78E-05 | 0.000221 |
| BARK1                           | beta-adrenergic receptor kinase 1                                 | 1.45 | 0.000252 | 0.0017   | 1.7  | 8.14E-06 | 8.13E-05 |
| DC-SIGNR                        | C-type lectin domain family 4 member M                            | 1.1  | 0.000298 | 0.00199  | 1.04 | 0.153    | 0.284    |
| NAP-2                           | Neutrophil-activating peptide 2                                   | 1.53 | 0.000329 | 0.00219  | 1.94 | 4.97E-06 | 5.51E-05 |
| CTAP-III                        | Connective tissue-activating peptide III                          | 1.53 | 0.000341 | 0.00225  | 1.95 | 3.82E-06 | 0.000044 |
| PDE5A                           | cGMP-specific 3',5'-cyclic phosphodiesterase                      | 1.5  | 0.000403 | 0.00263  | 1.57 | 0.00072  | 0.00344  |
| PA2G4                           | Proliferation-associated protein 2G4                              | 1.42 | 0.000445 | 0.00287  | 1.76 | 1.56E-06 | 2.12E-05 |
| IL-19                           | Interleukin-19                                                    | 1.13 | 0.000454 | 0.00291  | 1.11 | 0.00799  | 0.0258   |
| HDAC8                           | Histone deacetylase 8                                             | 1.13 | 0.000546 | 0.00344  | 1.15 | 0.00221  | 0.00859  |
| ATS13                           | A disintegrin and metalloproteinase with thrombospondin motifs 13 | 1.15 | 0.000602 | 0.00374  | 1.04 | 0.37     | 0.541    |
| PPID                            | Peptidyl-prolyl cis-trans isomerase D                             | 1.62 | 0.000641 | 0.00393  | 1.78 | 0.000366 | 0.00198  |
| M2-PK                           | Pyruvate kinase PKM                                               | 1.52 | 0.000669 | 0.00408  | 1.74 | 6.65E-05 | 0.000475 |
| Calcineurin                     | Calcineurin                                                       | 1.32 | 0.000692 | 0.0042   | 1.44 | 9.08E-05 | 0.000618 |
| TIMP-3                          | Metalloproteinase inhibitor 3                                     | 1.38 | 0.00077  | 0.00465  | 1.39 | 0.0037   | 0.0135   |
| Aflatoxin B1 aldehyde reductase | Aflatoxin B1 aldehyde reductase member 2                          | 1.5  | 0.000774 | 0.00465  | 1.91 | 4.52E-06 | 5.05E-05 |
| BTK                             | Tyrosine-protein kinase BTK                                       | 1.49 | 0.000847 | 0.00503  | 1.89 | 2.92E-06 | 3.51E-05 |
| Nidogen                         | Nidogen-1                                                         | 1.11 | 0.000909 | 0.00532  | 1.15 | 0.000267 | 0.00148  |
| PKC-B-II                        | Protein kinase C beta type                                        | 1.54 | 0.000923 | 0.00537  | 1.92 | 2.97E-05 | 0.000235 |

SUPPLEMENTARY DATA

|                                 |                                                               |      |          |         |       |          |          |
|---------------------------------|---------------------------------------------------------------|------|----------|---------|-------|----------|----------|
|                                 | (splice variant beta-II)                                      |      |          |         |       |          |          |
| Cyclophilin A                   | Peptidyl-prolyl cis-trans isomerase A                         | 1.2  | 0.00094  | 0.00541 | 1.35  | 1.65E-05 | 0.000143 |
| FGF-20                          | Fibroblast growth factor 20                                   | 1.14 | 0.000965 | 0.00553 | 1.1   | 0.000779 | 0.00369  |
| Stress-induced-phosphoprotein 1 | Stress-induced-phosphoprotein 1                               | 1.36 | 0.00102  | 0.00583 | 1.65  | 7.35E-06 | 7.47E-05 |
| SNAA                            | Alpha-soluble NSF attachment protein                          | 1.37 | 0.00103  | 0.00587 | 1.69  | 3.16E-06 | 3.71E-05 |
| PDGF-AA                         | Platelet-derived growth factor subunit A                      | 1.37 | 0.00105  | 0.00593 | 1.66  | 1.34E-05 | 0.000121 |
| Phosphoglycerate mutase 1       | Phosphoglycerate mutase 1                                     | 2.37 | 0.0011   | 0.00615 | 4.2   | 1.68E-05 | 0.000145 |
| Transketolase                   | Transketolase                                                 | 1.28 | 0.00113  | 0.00628 | 1.54  | 1.69E-06 | 2.24E-05 |
| Afamin                          | Afamin                                                        | 1.1  | 0.00119  | 0.00657 | 1.05  | 0.181    | 0.322    |
| BASI                            | Basigin                                                       | 1.12 | 0.00124  | 0.00679 | 1.17  | 0.000222 | 0.0013   |
| Triosephosphate isomerase       | Triosephosphate isomerase                                     | 1.31 | 0.00128  | 0.00699 | 1.61  | 2.19E-06 | 2.74E-05 |
| ASM3A                           | Acid sphingomyelinase-like phosphodiesterase 3a               | 1.17 | 0.00129  | 0.00699 | 1.23  | 3.13E-06 | 3.71E-05 |
| Factor B                        | Complement factor B                                           | 1.08 | 0.00142  | 0.00761 | 1.09  | 0.00125  | 0.00529  |
| HMG-1                           | High mobility group protein B1                                | 1.19 | 0.00154  | 0.00821 | 1.28  | 0.000149 | 0.000921 |
| HGFA                            | Hepatocyte growth factor activator                            | 1.23 | 0.00156  | 0.00829 | 1.24  | 0.0117   | 0.0357   |
| IF4G2                           | Eukaryotic translation initiation factor 4 gamma 2            | 1.39 | 0.00166  | 0.00875 | 1.63  | 0.000083 | 0.000575 |
| PKC-A                           | Protein kinase C alpha type                                   | 1.4  | 0.00169  | 0.00889 | 1.61  | 0.000226 | 0.00132  |
| TCTP                            | Translationally-controlled tumor protein                      | 1.31 | 0.00182  | 0.00946 | 1.63  | 3.33E-06 | 3.88E-05 |
| phosphoglycerate kinase 1       | Phosphoglycerate kinase 1                                     | 1.22 | 0.00189  | 0.00977 | 1.26  | 0.00107  | 0.00475  |
| Testican-1                      | Testican-1                                                    | 1.12 | 0.0019   | 0.0098  | 1.21  | 1.43E-05 | 0.000128 |
| Sphingosine kinase 1            | Sphingosine kinase 1                                          | 1.41 | 0.00192  | 0.00984 | 1.69  | 4.41E-05 | 0.000325 |
| IMB1                            | Importin subunit beta-1                                       | 1.4  | 0.00194  | 0.00992 | 1.52  | 0.000857 | 0.00397  |
| LY86                            | Lymphocyte antigen 86                                         | 1.08 | 0.00214  | 0.0108  | 1.13  | 0.000121 | 0.000777 |
| BAFF                            | Tumor necrosis factor ligand superfamily member 13B           | 1.15 | 0.00227  | 0.0114  | 1.07  | 0.218    | 0.37     |
| 4EBP2                           | Eukaryotic translation initiation factor 4E-binding protein 2 | 1.14 | 0.00229  | 0.0115  | 1.19  | 0.000928 | 0.00423  |
| RANTES                          | C-C motif chemokine 5                                         | 1.43 | 0.00247  | 0.0123  | 1.89  | 1.24E-05 | 0.000115 |
| Protease nexin I                | Glia-derived nexin                                            | 1.17 | 0.00259  | 0.0128  | 1.21  | 0.0027   | 0.0101   |
| SBDS                            | Ribosome maturation protein SBDS                              | 1.41 | 0.0027   | 0.0133  | 1.68  | 0.000103 | 0.000683 |
| Thrombospondin-1                | Thrombospondin-1                                              | 1.38 | 0.00307  | 0.0149  | 1.66  | 8.27E-05 | 0.000575 |
| CDK8/cyclin C                   | Cyclin-dependent kinase 8:Cyclin-C complex                    | 1.14 | 0.00304  | 0.0149  | 1.21  | 0.000293 | 0.00161  |
| ALT                             | Alanine aminotransferase 1                                    | 1.11 | 0.00316  | 0.0153  | 1.19  | 0.000195 | 0.00115  |
| Calpain I                       | Calpain I                                                     | 1.32 | 0.00329  | 0.0157  | 1.64  | 6.34E-06 | 6.69E-05 |
| BDNF                            | Brain-derived neurotrophic factor                             | 1.2  | 0.00329  | 0.0157  | 1.38  | 4.32E-06 | 4.88E-05 |
| Esterase D                      | S-formylglutathione hydrolase                                 | 1.32 | 0.00328  | 0.0157  | 1.43  | 0.00172  | 0.00703  |
| SHBG                            | Sex hormone-binding                                           | 1.25 | 0.00336  | 0.0159  | -1.01 | 0.895    | 0.935    |

SUPPLEMENTARY DATA

|                                     |                                                     |      |         |        |      |          |          |
|-------------------------------------|-----------------------------------------------------|------|---------|--------|------|----------|----------|
|                                     | globulin                                            |      |         |        |      |          |          |
| LYNB                                | Tyrosine-protein kinase Lyn, isoform B              | 1.26 | 0.00386 | 0.018  | 1.36 | 0.000594 | 0.00294  |
| METAP1                              | Methionine aminopeptidase 1                         | 1.3  | 0.00392 | 0.0182 | 1.28 | 0.0262   | 0.0706   |
| DKK1                                | Dickkopf-related protein 1                          | 1.24 | 0.00404 | 0.0186 | 1.4  | 0.000195 | 0.00115  |
| RAN                                 | GTP-binding nuclear protein Ran                     | 1.47 | 0.00403 | 0.0186 | 1.63 | 0.000902 | 0.00414  |
| a2-HS-Glycoprotein                  | Alpha-2-HS-glycoprotein                             | 1.07 | 0.00419 | 0.0192 | 1.05 | 0.0668   | 0.147    |
| Bone proteoglycan II                | Decorin                                             | 1.09 | 0.00432 | 0.0197 | 1.09 | 0.0114   | 0.0351   |
| Myokinase, human                    | Adenylate kinase isoenzyme 1                        | 1.31 | 0.00431 | 0.0197 | 1.53 | 9.35E-05 | 0.000628 |
| PF-4                                | Platelet factor 4                                   | 1.74 | 0.00444 | 0.0199 | 2.69 | 1.32E-05 | 0.00012  |
| annexin VI                          | Annexin A6                                          | 1.36 | 0.00441 | 0.0199 | 1.65 | 7.18E-05 | 0.000507 |
| HPG-                                | 15-hydroxyprostaglandin dehydrogenase [NAD(+)]      | 1.09 | 0.00442 | 0.0199 | 1.15 | 0.0003   | 0.00164  |
| WISP-1                              | WNT1-inducible-signaling pathway protein 1          | 1.12 | 0.00453 | 0.0202 | 1.15 | 0.00381  | 0.0138   |
| Cadherin-6                          | Cadherin-6                                          | 1.13 | 0.00456 | 0.0203 | 1.17 | 0.000889 | 0.0041   |
| UBC9                                | SUMO-conjugating enzyme UBC9                        | 1.23 | 0.0051  | 0.0224 | 1.48 | 8.7E-06  | 8.54E-05 |
| ARP19                               | cAMP-regulated phosphoprotein 19                    | 1.28 | 0.00535 | 0.0233 | 1.55 | 1.56E-05 | 0.000138 |
| RAC1                                | Ras-related C3 botulinum toxin substrate 1          | 1.35 | 0.00545 | 0.0236 | 1.73 | 1.01E-05 | 9.57E-05 |
| Aminoacylase-1                      | Aminoacylase-1                                      | 1.26 | 0.00561 | 0.0243 | 1.07 | 0.521    | 0.686    |
| BCL2-like 1 protein                 | Bcl-2-like protein 1                                | 1.18 | 0.00572 | 0.0247 | 1.29 | 0.000227 | 0.00132  |
| Caspase-3                           | Caspase-3                                           | 1.3  | 0.00578 | 0.0248 | 1.44 | 0.0012   | 0.00509  |
| ERK-1                               | Mitogen-activated protein kinase 3                  | 1.25 | 0.00607 | 0.0259 | 1.42 | 0.000165 | 0.00101  |
| ARTS1                               | Endoplasmic reticulum aminopeptidase 1              | 1.21 | 0.00609 | 0.0259 | 1.18 | 0.0603   | 0.135    |
| LDH-H 1                             | L-lactate dehydrogenase B chain                     | 1.16 | 0.00625 | 0.0264 | 1.3  | 5.86E-05 | 0.000424 |
| FER                                 | Tyrosine-protein kinase Fer                         | 1.29 | 0.00639 | 0.0269 | 1.35 | 0.00467  | 0.0165   |
| sICAM-3                             | Intercellular adhesion molecule 3                   | 1.12 | 0.00662 | 0.0276 | 1.09 | 0.11     | 0.218    |
| Rab GDP dissociation inhibitor beta | Rab GDP dissociation inhibitor beta                 | 1.19 | 0.00662 | 0.0276 | 1.39 | 1.47E-05 | 0.00013  |
| RET                                 | Proto-oncogene tyrosine-protein kinase receptor Ret | 1.13 | 0.00689 | 0.0285 | 1.03 | 0.564    | 0.725    |
| MDHC                                | Malate dehydrogenase, cytoplasmic                   | 1.17 | 0.00701 | 0.0289 | 1.33 | 4.83E-05 | 0.000352 |
| ERBB3                               | Receptor tyrosine-protein kinase erbB-3             | 1.07 | 0.00728 | 0.0298 | 1.02 | 0.553    | 0.718    |
| NDP kinase B                        | Nucleoside diphosphate kinase B                     | 1.29 | 0.00755 | 0.0308 | 1.55 | 0.000121 | 0.000777 |
| Thyroxine-Binding Globulin          | Thyroxine-binding globulin                          | 1.07 | 0.00773 | 0.0314 | 1.03 | 0.415    | 0.583    |
| NAGK                                | N-acetyl-D-glucosamine kinase                       | 1.12 | 0.00782 | 0.0316 | 1.16 | 0.00234  | 0.00898  |
| PDPK1                               | 3-phosphoinositide-dependent protein kinase 1       | 1.27 | 0.00783 | 0.0316 | 1.48 | 0.000115 | 0.000762 |



SUPPLEMENTARY DATA

|               |                                                      |      |         |        |      |          |          |
|---------------|------------------------------------------------------|------|---------|--------|------|----------|----------|
| LYN           | Tyrosine-protein kinase Lyn                          | 1.27 | 0.00819 | 0.0327 | 1.43 | 0.00048  | 0.00249  |
| CPNE1         | Copine-1                                             | 1.4  | 0.00818 | 0.0327 | 1.69 | 0.000189 | 0.00113  |
| CNTN2         | Contactin-2                                          | 1.15 | 0.00843 | 0.0334 | 1.04 | 0.5      | 0.675    |
| FGF-8B        | Fibroblast growth factor 8 isoform B                 | 1.12 | 0.00851 | 0.0336 | 1.1  | 0.101    | 0.204    |
| Cyclophilin F | Peptidyl-prolyl cis-trans isomerase F, mitochondrial | 1.38 | 0.00862 | 0.0339 | 1.68 | 0.000572 | 0.00284  |
| PAI-1         | Plasminogen activator inhibitor 1                    | 1.45 | 0.0088  | 0.0344 | 1.74 | 0.000535 | 0.00271  |
| UBE2N         | Ubiquitin-conjugating enzyme E2 N                    | 1.27 | 0.00904 | 0.0351 | 1.59 | 1.94E-05 | 0.000164 |
| AMPK a2b2g1   | AMP Kinase (alpha2beta2gamma1)                       | 1.21 | 0.00957 | 0.037  | 1.37 | 0.000411 | 0.00219  |
| CSK           | Tyrosine-protein kinase CSK                          | 1.34 | 0.0104  | 0.0397 | 1.77 | 0.00002  | 0.000166 |
| PTP-1B        | Tyrosine-protein phosphatase non-receptor type 1     | 1.12 | 0.0105  | 0.0399 | 1.18 | 0.00242  | 0.00928  |
| FYN           | Tyrosine-protein kinase Fyn                          | 1.27 | 0.0106  | 0.0402 | 1.34 | 0.00875  | 0.0277   |
| OBCAM         | Opioid-binding protein/cell adhesion molecule        | 1.09 | 0.0107  | 0.0406 | 1.08 | 0.0372   | 0.0935   |
| KYNU          | Kynureninase                                         | 1.12 | 0.0118  | 0.0445 | 1.16 | 0.00372  | 0.0135   |
| C6            | Complement component C6                              | 1.1  | 0.0126  | 0.0471 | 1.1  | 0.0572   | 0.13     |

P: p-value, FDR: False Discovery Rate, FC: Fold Change. CKD refers to Chronic kidney Disease Stage 3b, as defined by eGFR<45 ml/min/1.73 m<sup>2</sup>.

\*Adjusted analyses included covariates HbA1c, BMI, HDL, triglycerides, c-peptide, exercise and hypertensive meds.

SUPPLEMENTARY DATA

Supplementary Table S6. Down-regulated proteins (FDR<0.05) in the plasma from Joslin Medalists who were CKD Protected vs. Non-protected (SOMAscan) – unadjusted and adjusted analyses.

| Target                 | Target full name                                      | Unadjusted |          |          | Adjusted* |          |          |
|------------------------|-------------------------------------------------------|------------|----------|----------|-----------|----------|----------|
|                        |                                                       | FC         | p        | FDR      | FC        | p        | FDR      |
| Cystatin C             | Cystatin-C                                            | -1.7       | 2.13E-28 | 2.41E-25 | -1.54     | 8.18E-20 | 9.23E-17 |
| UNC5H3                 | Netrin receptor UNC5C                                 | -1.41      | 2.73E-23 | 1.54E-20 | -1.39     | 9.76E-17 | 3.83E-14 |
| EphB6                  | Ephrin type-B receptor 6                              | -1.35      | 9.12E-23 | 3.43E-20 | -1.33     | 2.92E-15 | 3.3E-13  |
| Epithelial cell kinase | Ephrin type-A receptor 2                              | -1.7       | 1.37E-22 | 3.88E-20 | -1.65     | 1.02E-16 | 3.83E-14 |
| FSTL3                  | Follistatin-related protein 3                         | -1.53      | 1.06E-21 | 2.39E-19 | -1.45     | 2.69E-16 | 4.53E-14 |
| TNF sR-I               | Tumor necrosis factor receptor superfamily member 1A  | -1.69      | 1.42E-21 | 2.66E-19 | -1.54     | 2.59E-16 | 4.53E-14 |
| Endostatin             | Endostatin                                            | -1.42      | 3.14E-21 | 5.07E-19 | -1.34     | 6.68E-13 | 3.59E-11 |
| b2-Microglobulin       | Beta-2-microglobulin                                  | -1.82      | 6.19E-21 | 8.74E-19 | -1.65     | 1.74E-14 | 1.64E-12 |
| TNF sR-II              | Tumor necrosis factor receptor superfamily member 1B  | -1.55      | 1.1E-20  | 1.38E-18 | -1.48     | 3.48E-14 | 2.62E-12 |
| RELT                   | Tumor necrosis factor receptor superfamily member 19L | -1.68      | 1.54E-20 | 1.74E-18 | -1.6      | 1.08E-13 | 7.03E-12 |
| TFF3                   | Trefoil factor 3                                      | -1.87      | 4.76E-20 | 4.88E-18 | -1.73     | 1.77E-15 | 2.21E-13 |
| DAN                    | Neuroblastoma suppressor of tumorigenicity 1          | -2.77      | 1.24E-19 | 1.17E-17 | -2.62     | 2.81E-16 | 4.53E-14 |
| Ephrin-A4              | Ephrin-A4                                             | -1.59      | 2.07E-19 | 1.79E-17 | -1.5      | 3.36E-14 | 2.62E-12 |
| Cathepsin H            | Cathepsin H                                           | -1.42      | 3.43E-19 | 2.77E-17 | -1.33     | 1.12E-13 | 7.03E-12 |
| UNC5H4                 | Netrin receptor UNC5D                                 | -1.59      | 4.62E-19 | 3.48E-17 | -1.63     | 1.08E-15 | 1.53E-13 |
| IGFBP-6                | Insulin-like growth factor-binding protein 6          | -1.51      | 5.81E-19 | 4.1E-17  | -1.42     | 4.69E-13 | 2.65E-11 |
| JAM-B                  | Junctional adhesion molecule B                        | -1.41      | 1.26E-18 | 8.37E-17 | -1.35     | 4.44E-12 | 2.18E-10 |
| DAF                    | Complement decay-accelerating factor                  | -1.33      | 6.77E-18 | 4.25E-16 | -1.37     | 1.14E-14 | 1.17E-12 |
| Lipocalin 2            | Neutrophil gelatinase-associated lipocalin            | -1.74      | 1.48E-17 | 8.78E-16 | -1.58     | 3.47E-11 | 1.45E-09 |
| Ephrin-A5              | Ephrin-A5                                             | -1.52      | 2.41E-17 | 1.31E-15 | -1.54     | 1.94E-16 | 4.53E-14 |
| DR6                    | Tumor necrosis factor receptor superfamily member 21  | -1.28      | 2.43E-17 | 1.31E-15 | -1.3      | 3.16E-13 | 1.88E-11 |
| SLPI                   | Antileukoproteinase                                   | -1.33      | 4.66E-17 | 2.29E-15 | -1.28     | 1.06E-11 | 4.6E-10  |
| TAJ                    | Tumor necrosis factor receptor superfamily member 19  | -1.8       | 4.52E-17 | 2.29E-15 | -1.85     | 3.16E-14 | 2.62E-12 |
| Layilin                | Layilin                                               | -1.55      | 7.74E-17 | 3.64E-15 | -1.51     | 1.44E-12 | 7.36E-11 |
| DERM                   | Dermatopontin                                         | -1.36      | 6.15E-16 | 2.67E-14 | -1.32     | 1.05E-10 | 4.1E-09  |
| MATN2                  | Matrilin-2                                            | -1.32      | 7.1E-16  | 2.97E-14 | -1.35     | 9.54E-14 | 6.73E-12 |
| RGMB                   | RGM domain family member B                            | -1.3       | 9.58E-16 | 3.86E-14 | -1.33     | 7.75E-12 | 3.5E-10  |
| ROR1                   | Tyrosine-protein kinase transmembrane receptor ROR1   | -1.29      | 1.04E-15 | 4.05E-14 | -1.31     | 4.95E-12 | 2.33E-10 |
| Cystatin M             | Cystatin-M                                            | -1.66      | 1.2E-15  | 4.51E-14 | -1.46     | 8.06E-08 | 1.62E-06 |
| ARMEL                  | Cerebral dopamine neurotrophic factor                 | -1.49      | 1.72E-15 | 6.26E-14 | -1.4      | 3.03E-08 | 7.43E-07 |

SUPPLEMENTARY DATA

|                 |                                                      |       |          |          |       |          |          |
|-----------------|------------------------------------------------------|-------|----------|----------|-------|----------|----------|
| TIMD3           | Hepatitis A virus cellular receptor 2                | -1.43 | 1.99E-15 | 7.02E-14 | -1.42 | 2.01E-10 | 7.34E-09 |
| MIP-5           | C-C motif chemokine 15                               | -1.56 | 4.76E-15 | 1.63E-13 | -1.47 | 8.39E-09 | 2.43E-07 |
| HCC-1           | C-C motif chemokine 14                               | -1.77 | 4.82E-14 | 1.6E-12  | -1.67 | 8.57E-11 | 3.46E-09 |
| Elafin          | Elafin                                               | -1.75 | 5.01E-14 | 1.61E-12 | -1.6  | 6.93E-09 | 2.06E-07 |
| Trypsin 2       | Trypsin-2                                            | -1.9  | 2.67E-13 | 8.38E-12 | -1.73 | 9.2E-09  | 2.6E-07  |
| URB             | Coiled-coil domain-containing protein 80             | -1.29 | 7.88E-13 | 2.4E-11  | -1.29 | 1.14E-08 | 3.07E-07 |
| EPHB2           | Ephrin type-B receptor 2                             | -1.33 | 1.25E-12 | 3.7E-11  | -1.37 | 4.59E-10 | 1.62E-08 |
| CAPG            | Macrophage-capping protein                           | -1.74 | 1.53E-12 | 4.42E-11 | -1.37 | 0.00016  | 0.000981 |
| DLL1            | Delta-like protein 1                                 | -1.23 | 3.07E-12 | 8.67E-11 | -1.23 | 2.8E-09  | 8.8E-08  |
| VEGF            | Vascular endothelial growth factor A                 | -1.24 | 3.92E-12 | 1.08E-10 | -1.18 | 1.93E-06 | 2.48E-05 |
| MMP-7           | Matrilysin                                           | -1.71 | 5.71E-12 | 1.53E-10 | -1.68 | 6.16E-09 | 1.88E-07 |
| PYY             | Peptide YY                                           | -1.51 | 1.3E-11  | 3.42E-10 | -1.45 | 1.92E-07 | 3.39E-06 |
| CATZ            | Cathepsin Z                                          | -1.32 | 2.05E-11 | 5.26E-10 | -1.33 | 3.24E-08 | 7.61E-07 |
| Factor D        | Complement factor D                                  | -1.36 | 2.46E-11 | 6.17E-10 | -1.24 | 0.00012  | 0.000777 |
| IL-15 Ra        | Interleukin-15 receptor subunit alpha                | -1.31 | 3.48E-11 | 8.54E-10 | -1.29 | 2.47E-09 | 8.13E-08 |
| CNTFR alpha     | Ciliary neurotrophic factor receptor subunit alpha   | -1.33 | 4.17E-11 | 1E-09    | -1.34 | 2.31E-08 | 5.8E-07  |
| IL-16           | Interleukin-16                                       | -1.33 | 4.72E-11 | 1.11E-09 | -1.25 | 5.1E-06  | 5.59E-05 |
| NRX1B           | Neurexin-1-beta                                      | -1.39 | 6.61E-11 | 1.52E-09 | -1.41 | 1.64E-08 | 4.31E-07 |
| PAPP-A          | Pappalysin-1                                         | -1.49 | 1.05E-10 | 2.33E-09 | -1.42 | 1.11E-06 | 1.55E-05 |
| NRX3B           | Neurexin-3-beta                                      | -1.26 | 1.03E-10 | 2.33E-09 | -1.32 | 2.52E-09 | 8.13E-08 |
| IL-18 BPa       | Interleukin-18-binding protein                       | -1.35 | 1.74E-10 | 3.78E-09 | -1.36 | 2.8E-07  | 4.59E-06 |
| TIG2            | Retinoic acid receptor responder protein 2           | -1.39 | 2.56E-10 | 5.45E-09 | -1.29 | 2.39E-05 | 0.000192 |
| MP2K2           | Dual specificity mitogen-activated protein kinase 2  | -1.49 | 4.07E-10 | 8.5E-09  | -1.27 | 0.00109  | 0.00479  |
| BSSP4           | Brain-specific serine protease 4                     | -1.35 | 4.91E-10 | 1.01E-08 | -1.35 | 1.33E-07 | 2.45E-06 |
| Angiogenin      | Angiogenin                                           | -1.31 | 5.4E-10  | 1.09E-08 | -1.19 | 0.000183 | 0.0011   |
| CD70            | CD70 antigen                                         | -1.23 | 6.5E-10  | 1.29E-08 | -1.17 | 3.62E-05 | 0.000276 |
| TF              | Tissue Factor                                        | -1.48 | 1.2E-09  | 2.33E-08 | -1.31 | 0.00025  | 0.00141  |
| IL-17 RC        | Interleukin-17 receptor C                            | -1.41 | 1.25E-09 | 2.4E-08  | -1.34 | 2.21E-05 | 0.000182 |
| RGMA            | Repulsive guidance molecule A                        | -1.24 | 1.49E-09 | 2.81E-08 | -1.29 | 1.26E-09 | 4.31E-08 |
| FABP            | Fatty acid-binding protein, heart                    | -1.57 | 3.04E-09 | 5.62E-08 | -1.51 | 2.58E-07 | 4.28E-06 |
| XEDAR           | Tumor necrosis factor receptor superfamily member 27 | -1.45 | 3.78E-09 | 6.89E-08 | -1.38 | 7.23E-06 | 7.47E-05 |
| Nogo Receptor   | Reticulon-4 receptor                                 | -1.28 | 3.88E-09 | 6.94E-08 | -1.22 | 2.36E-05 | 0.00019  |
| IL-13 Ra1       | Interleukin-13 receptor subunit alpha-1              | -1.28 | 4.38E-09 | 7.73E-08 | -1.3  | 4.48E-08 | 1.01E-06 |
| Stanniocalcin-1 | Stanniocalcin-1                                      | -1.27 | 6.96E-09 | 1.21E-07 | -1.23 | 1.6E-06  | 2.15E-05 |
| CRDL1           | Chordin-like protein 1                               | -1.26 | 9.11E-09 | 1.56E-07 | -1.35 | 1.84E-10 | 6.91E-09 |
| Renin           | Renin                                                | -2.05 | 1.15E-08 | 1.94E-07 | -1.82 | 3.46E-05 | 0.000267 |
| TNR4            | Tumor necrosis factor receptor superfamily           | -1.48 | 1.69E-08 | 2.8E-07  | -1.59 | 7.67E-08 | 1.6E-06  |

SUPPLEMENTARY DATA

|                       |                                                      |       |          |          |       |          |          |
|-----------------------|------------------------------------------------------|-------|----------|----------|-------|----------|----------|
|                       | member 4                                             |       |          |          |       |          |          |
| MK11                  | Mitogen-activated protein kinase 11                  | -1.56 | 1.79E-08 | 2.93E-07 | -1.39 | 0.000262 | 0.00147  |
| IGFBP-4               | Insulin-like growth factor-binding protein 4         | -1.21 | 3.62E-08 | 5.84E-07 | -1.13 | 0.00154  | 0.00637  |
| CXCL16, soluble       | C-X-C motif chemokine 16                             | -1.19 | 3.94E-08 | 6.26E-07 | -1.16 | 3.27E-05 | 0.000255 |
| resistin              | Resistin                                             | -1.34 | 4.97E-08 | 7.69E-07 | -1.26 | 0.000149 | 0.000921 |
| CLM6                  | CMRF35-like molecule 6                               | -1.25 | 4.97E-08 | 7.69E-07 | -1.31 | 6.93E-08 | 1.48E-06 |
| EphA5                 | Ephrin type-A receptor 5                             | -1.3  | 5.63E-08 | 8.58E-07 | -1.34 | 8.47E-07 | 1.23E-05 |
| Ck-b-8-1              | Ck-beta-8-1                                          | -1.27 | 6.23E-08 | 9.38E-07 | -1.24 | 3.61E-05 | 0.000276 |
| EphA1                 | Ephrin type-A receptor 1                             | -1.51 | 9.17E-08 | 1.36E-06 | -1.47 | 1.98E-06 | 2.51E-05 |
| Kallikrein 11         | Kallikrein-11                                        | -1.35 | 1.04E-07 | 1.53E-06 | -1.4  | 5.71E-08 | 1.24E-06 |
| kallikrein 8          | Kallikrein-8                                         | -1.39 | 1.14E-07 | 1.65E-06 | -1.48 | 3.44E-08 | 7.93E-07 |
| TSP2                  | Thrombospondin-2                                     | -1.48 | 1.47E-07 | 2.09E-06 | -1.47 | 2.15E-07 | 3.69E-06 |
| MMP-12                | Macrophage metalloelastase                           | -1.54 | 1.63E-07 | 2.27E-06 | -1.65 | 9.81E-07 | 0.000014 |
| PTN                   | Pleiotrophin                                         | -1.26 | 1.68E-07 | 2.32E-06 | -1.21 | 8.19E-05 | 0.000574 |
| IGFBP-5               | Insulin-like growth factor-binding protein 5         | -1.16 | 2.3E-07  | 3.09E-06 | -1.15 | 3.15E-05 | 0.000247 |
| TGF- $\beta$ R III    | Transforming growth factor beta receptor type 3      | -1.15 | 2.39E-07 | 3.18E-06 | -1.18 | 6.5E-07  | 9.53E-06 |
| PKC-G                 | Protein kinase C gamma type                          | -1.23 | 2.51E-07 | 3.3E-06  | -1.21 | 0.00013  | 0.000817 |
| Nectin-like protein 1 | Cell adhesion molecule 3                             | -1.33 | 3.24E-07 | 4.21E-06 | -1.39 | 3.67E-07 | 5.75E-06 |
| Periostin             | Periostin                                            | -1.28 | 3.3E-07  | 4.23E-06 | -1.25 | 0.000118 | 0.000775 |
| MPIF-1                | C-C motif chemokine 23                               | -1.23 | 3.47E-07 | 4.4E-06  | -1.16 | 0.00194  | 0.00773  |
| RGM-C                 | Hemojuvelin                                          | -1.17 | 3.93E-07 | 4.93E-06 | -1.23 | 1.79E-08 | 4.6E-07  |
| bFGF-R                | Fibroblast growth factor receptor 1                  | -1.14 | 4.71E-07 | 5.81E-06 | -1.18 | 7.87E-08 | 1.62E-06 |
| IL-17F                | Interleukin-17F                                      | -1.52 | 4.73E-07 | 5.81E-06 | -1.49 | 3.21E-08 | 7.61E-07 |
| HVEM                  | Tumor necrosis factor receptor superfamily member 14 | -1.27 | 5.15E-07 | 6.18E-06 | -1.29 | 5.99E-06 | 0.000065 |
| Lysozyme              | Lysozyme C                                           | -1.15 | 5.89E-07 | 0.000007 | -1.16 | 0.000023 | 0.000187 |
| ERP29                 | Endoplasmic reticulum resident protein 29            | -1.21 | 7.37E-07 | 8.66E-06 | -1.13 | 0.0036   | 0.0132   |
| TSP4                  | Thrombospondin-4                                     | -1.21 | 7.67E-07 | 8.92E-06 | -1.17 | 0.000568 | 0.00284  |
| NKp30                 | Natural cytotoxicity triggering receptor 3           | -1.38 | 9.11E-07 | 1.05E-05 | -1.48 | 7.5E-06  | 7.56E-05 |
| CSF-1                 | Macrophage colony-stimulating factor 1               | -1.31 | 1.11E-06 | 1.25E-05 | -1.31 | 1.58E-05 | 0.000139 |
| Fractalkine/CX3CL-1   | Fractalkine                                          | -1.24 | 1.67E-06 | 1.84E-05 | -1.26 | 1.86E-05 | 0.000159 |
| TIMP-1                | Metalloproteinase inhibitor 1                        | -1.17 | 2.06E-06 | 0.000022 | -1.11 | 0.00211  | 0.00826  |
| TNFSF15               | Tumor necrosis factor ligand superfamily member 15   | -1.38 | 2.07E-06 | 0.000022 | -1.46 | 4.13E-07 | 6.38E-06 |
| suPAR                 | Urokinase plasminogen activator surface receptor     | -1.24 | 2.33E-06 | 2.42E-05 | -1.29 | 8.4E-06  | 8.32E-05 |
| Trypsin               | Trypsin-1                                            | -1.53 | 3.22E-06 | 3.28E-05 | -1.42 | 0.0019   | 0.00761  |
| 4-1BB                 | Tumor necrosis factor receptor superfamily member 9  | -1.28 | 3.23E-06 | 3.28E-05 | -1.21 | 0.000518 | 0.00265  |

SUPPLEMENTARY DATA

|                                   |                                                                        |       |          |          |       |          |          |
|-----------------------------------|------------------------------------------------------------------------|-------|----------|----------|-------|----------|----------|
| HCC-4                             | C-C motif chemokine 16                                                 | -1.29 | 3.4E-06  | 3.43E-05 | -1.28 | 0.000182 | 0.0011   |
| Carbonic anhydrase III            | Carbonic anhydrase 3                                                   | -1.56 | 3.98E-06 | 3.94E-05 | -1.38 | 0.00355  | 0.0131   |
| PARC                              | C-C motif chemokine 18                                                 | -1.32 | 5.25E-06 | 5.16E-05 | -1.28 | 0.000481 | 0.00249  |
| WFKN2                             | WAP, Kazal, immunoglobulin, Kunitz and NTR domain-containing protein 2 | -1.24 | 5.45E-06 | 5.31E-05 | -1.3  | 6.06E-06 | 6.51E-05 |
| MIA                               | Melanoma-derived growth regulatory protein                             | -1.2  | 5.65E-06 | 5.44E-05 | -1.21 | 0.000122 | 0.000777 |
| IL-27                             | Interleukin-27                                                         | -1.2  | 5.75E-06 | 5.46E-05 | -1.14 | 0.00315  | 0.0117   |
| Troponin I, skeletal, fast twitch | Troponin I, fast skeletal muscle                                       | -1.51 | 7.59E-06 | 7.08E-05 | -1.49 | 0.000248 | 0.00141  |
| Myoglobin                         | Myoglobin                                                              | -1.35 | 7.88E-06 | 7.29E-05 | -1.29 | 0.000383 | 0.00206  |
| C34 gp41 HIV Fragment             | gp41 C34 peptide, HIV                                                  | -1.22 | 1.17E-05 | 0.000103 | -1.27 | 4.26E-06 | 4.86E-05 |
| SLIK5                             | SLIT and NTRK-like protein 5                                           | -1.25 | 1.45E-05 | 0.000122 | -1.32 | 2.41E-06 | 2.99E-05 |
| NKp46                             | Natural cytotoxicity triggering receptor 1                             | -1.23 | 1.73E-05 | 0.000144 | -1.26 | 0.00013  | 0.000817 |
| Angiopoietin-2                    | Angiopoietin-2                                                         | -1.3  | 2.07E-05 | 0.000168 | -1.25 | 0.000171 | 0.00104  |
| CD23                              | Low affinity immunoglobulin epsilon Fc receptor                        | -1.36 | 2.43E-05 | 0.000194 | -1.33 | 0.00162  | 0.00669  |
| IMDH1                             | Inosine-5'-monophosphate dehydrogenase 1                               | -1.51 | 3.73E-05 | 0.000293 | -1.32 | 0.0259   | 0.0704   |
| Spondin-1                         | Spondin-1                                                              | -1.18 | 8.12E-05 | 0.000615 | -1.12 | 0.0272   | 0.0728   |
| OX2G                              | OX-2 membrane glycoprotein                                             | -1.16 | 0.000108 | 0.000796 | -1.21 | 3.77E-05 | 0.000284 |
| BGH3                              | Transforming growth factor-beta-induced protein ig-h3                  | -1.15 | 0.000153 | 0.00108  | -1.14 | 0.00362  | 0.0132   |
| G-CSF                             | Granulocyte colony-stimulating factor                                  | -1.35 | 0.000165 | 0.00116  | -1.29 | 9.19E-05 | 0.000621 |
| Nectin-like protein 2             | Cell adhesion molecule 1                                               | -1.18 | 0.000169 | 0.00118  | -1.26 | 0.000013 | 0.000119 |
| ART                               | Agouti-related protein                                                 | -1.2  | 0.000189 | 0.00131  | -1.22 | 0.000522 | 0.00266  |
| GPNMB                             | Transmembrane glycoprotein NMB                                         | -1.16 | 0.000243 | 0.00166  | -1.19 | 0.000268 | 0.00148  |
| HSP 70                            | Heat shock 70 kDa protein 1A                                           | -1.19 | 0.00028  | 0.00188  | -1.15 | 0.0139   | 0.0414   |
| CD48                              | CD48 antigen                                                           | -1.14 | 0.000376 | 0.00247  | -1.19 | 9.81E-05 | 0.000656 |
| Prolactin Receptor                | Prolactin receptor                                                     | -1.16 | 0.000424 | 0.00275  | -1.14 | 0.0139   | 0.0414   |
| Glucagon                          | Glucagon                                                               | -1.5  | 0.000456 | 0.00291  | -1.58 | 0.00118  | 0.00506  |
| IL-11 RA                          | Interleukin-11 receptor subunit alpha                                  | -1.17 | 0.000463 | 0.00294  | -1.23 | 5.98E-05 | 0.00043  |
| LSAMP                             | Limbic system-associated membrane protein                              | -1.11 | 0.000549 | 0.00345  | -1.18 | 6.21E-06 | 6.62E-05 |
| BCMA                              | Tumor necrosis factor receptor superfamily member 17                   | -1.15 | 0.000599 | 0.00374  | -1.22 | 4.39E-05 | 0.000325 |
| CYTT                              | Cystatin-SA                                                            | -1.32 | 0.000627 | 0.00387  | -1.35 | 0.00171  | 0.00703  |
| pTEN                              | Phosphatidylinositol 3,4,5-trisphosphate 3-phosphatase and dual-       | -1.25 | 0.000825 | 0.00493  | -1.23 | 0.00767  | 0.0248   |

SUPPLEMENTARY DATA

|               |                                                               |       |          |         |       |          |          |
|---------------|---------------------------------------------------------------|-------|----------|---------|-------|----------|----------|
|               | specificity protein phosphatase PTEN                          |       |          |         |       |          |          |
| BSP           | Bone sialoprotein 2                                           | -1.3  | 0.000851 | 0.00503 | -1.34 | 0.00137  | 0.00577  |
| CYTN          | Cystatin-SN                                                   | -1.31 | 0.000892 | 0.00525 | -1.3  | 0.00649  | 0.0217   |
| IGFBP-2       | Insulin-like growth factor-binding protein 2                  | -1.17 | 0.000933 | 0.0054  | -1.15 | 0.00943  | 0.0294   |
| CYTD          | Cystatin-D                                                    | -1.37 | 0.00111  | 0.00618 | -1.43 | 0.00152  | 0.00629  |
| PD-L2         | Programmed cell death 1 ligand 2                              | -1.12 | 0.00119  | 0.00657 | -1.17 | 0.000146 | 0.00091  |
| sCD4          | T-cell surface glycoprotein CD4                               | -1.08 | 0.00141  | 0.00761 | -1.06 | 0.0354   | 0.0899   |
| GRN           | Granulins                                                     | -1.08 | 0.00154  | 0.00821 | -1.13 | 0.000126 | 0.000802 |
| OMD           | Osteomodulin                                                  | -1.17 | 0.00176  | 0.00917 | -1.25 | 0.000465 | 0.00243  |
| IL-17E        | Interleukin-25                                                | -1.17 | 0.00207  | 0.0105  | -1.17 | 0.0112   | 0.0346   |
| calgranulin B | Protein S100-A9                                               | -1.29 | 0.00212  | 0.0108  | -1.03 | 0.769    | 0.861    |
| IL-22         | Interleukin-22                                                | -1.26 | 0.00301  | 0.0148  | -1.22 | 0.00598  | 0.0202   |
| DLL4          | Delta-like protein 4                                          | -1.14 | 0.00335  | 0.0159  | -1.18 | 0.000751 | 0.00358  |
| Eotaxin       | Eotaxin                                                       | -1.22 | 0.00364  | 0.0172  | -1.36 | 0.000119 | 0.000777 |
| b-NGF         | beta-nerve growth factor                                      | -1.17 | 0.00379  | 0.0178  | -1.21 | 0.00291  | 0.0109   |
| GSTA3         | Glutathione S-transferase A3                                  | -1.35 | 0.00378  | 0.0178  | -1.19 | 0.166    | 0.302    |
| FGF-19        | Fibroblast growth factor 19                                   | -1.31 | 0.00441  | 0.0199  | -1.45 | 0.00187  | 0.00752  |
| TECK          | C-C motif chemokine 25                                        | -1.21 | 0.00483  | 0.0214  | -1.21 | 0.0277   | 0.0739   |
| HDGR2         | Hepatoma-derived growth factor-related protein 2              | -1.14 | 0.0049   | 0.0216  | -1.03 | 0.529    | 0.694    |
| PDE9A         | High affinity cGMP-specific 3',5'-cyclic phosphodiesterase 9A | -1.22 | 0.00524  | 0.0229  | -1.23 | 0.00728  | 0.0237   |
| CLC7A         | C-type lectin domain family 7 member A                        | -1.17 | 0.00582  | 0.0249  | -1.04 | 0.565    | 0.725    |
| LKHA4         | Leukotriene A-4 hydrolase                                     | -1.42 | 0.00655  | 0.0275  | -1.58 | 0.00292  | 0.0109   |
| IGF-I sR      | Insulin-like growth factor 1 receptor                         | -1.11 | 0.00674  | 0.028   | -1.17 | 0.000618 | 0.00303  |
| GIB           | Phospholipase A2                                              | -1.24 | 0.00724  | 0.0297  | -1.35 | 0.00132  | 0.00555  |
| MMP-16        | Matrix metalloproteinase-16                                   | -1.17 | 0.00816  | 0.0327  | -1.14 | 0.0784   | 0.169    |
| LAG-3         | Lymphocyte activation gene 3 protein                          | -1.19 | 0.00835  | 0.0332  | -1.29 | 0.00191  | 0.00761  |
| Activin A     | Inhibin beta A chain                                          | -1.17 | 0.00878  | 0.0344  | -1.11 | 0.134    | 0.256    |
| calreticulin  | Calreticulin                                                  | -1.12 | 0.0089   | 0.0346  | -1.15 | 0.00559  | 0.0191   |
| SIG14         | Sialic acid-binding Ig-like lectin 14                         | -1.22 | 0.0099   | 0.0382  | -1.36 | 0.000911 | 0.00417  |
| Galectin-3    | Galectin-3                                                    | -1.08 | 0.0102   | 0.0392  | -1.13 | 0.00173  | 0.00705  |
| IL-1 sRI      | Interleukin-1 receptor type 1                                 | -1.13 | 0.0108   | 0.0406  | -1.22 | 0.000245 | 0.00141  |
| MMP-14        | Matrix metalloproteinase-14                                   | -1.21 | 0.0126   | 0.0471  | -1.3  | 0.00695  | 0.0228   |

P: p-value, FDR: False Discovery Rate, FC: Fold Change. CKD refers to Chronic kidney Disease Stage 3b, as defined by eGFR<45 ml/min/1.73 m<sup>2</sup>.

\*Adjusted analyses included covariates HbA1c, BMI, HDL, triglycerides, c-peptide, exercise, and hypertensive medications.

SUPPLEMENTARY DATA

Supplementary Table S7. Correlations of ACR with glycolytic enzymes in DN strata.

| Enzyme              | Spearman Rank-Order Correlation with ACR (n=144) |              |               |          |            |          |
|---------------------|--------------------------------------------------|--------------|---------------|----------|------------|----------|
|                     | Overall                                          |              | No CKD (n=79) |          | CKD (n=65) |          |
|                     | <i>rho</i>                                       | <i>p</i>     | <i>rho</i>    | <i>p</i> | <i>rho</i> | <i>p</i> |
| TPI1                | -0.1                                             | 0.21         | 0.01          | 0.93     | -0.03      | 0.84     |
| LDHB                | -0.04                                            | 0.6          | 0.07          | 0.54     | 0.07       | 0.56     |
| MDH1                | -0.1                                             | 0.21         | -0.05         | 0.64     | 0.02       | 0.89     |
| <b>PKM2</b>         | <b>-0.18</b>                                     | <b>0.03</b>  | 0.1           | 0.38     | -0.15      | 0.23     |
| PGAM1               | -0.09                                            | 0.28         | -0.11         | 0.33     | 0.03       | 0.84     |
| <b>Cytochrome C</b> | <b>-0.25</b>                                     | <b>0.002</b> | 0.21          | 0.06     | -0.21      | 0.09     |
| GAPDH               | -0.08                                            | 0.35         | -0.1          | 0.36     | -0.002     | 0.99     |

CKD defined as Chronic Kidney Disease stage 3b, that is, CKD-EPI eGFR<45mL/min/1.73m<sup>2</sup>; rho is the correlation coefficient.

SUPPLEMENTARY DATA

Supplementary Table S8. Clinical characteristics of Joslin Medalists with and without Metabolomics data.

| Characteristic                     | Overall Cohort<br>N=1008 | Metabolomic set<br>(N=214) | Non-Metabolomic<br>set (N=794) | P-value |
|------------------------------------|--------------------------|----------------------------|--------------------------------|---------|
| Male, %                            | 46                       | 56                         | 43                             | <.001   |
| Age (Years)                        | 65.8±7.6                 | 66.3±8.0                   | 65.7±7.5                       | 0.31    |
| Duration (Years)                   | 54.7±5.7                 | 55.21±6.3                  | 54.53±5.6                      | 0.12    |
| BMI (kg/m <sup>2</sup> )           | 26.2±4.7                 | 26.2±4.8                   | 26.20±4.2                      | 0.96    |
| Insulin dose (units/kg)            | 0.46±0.17                | 0.46±0.2                   | 0.46±0.2                       | 0.93    |
| HbA <sub>1c</sub> (%)              | 7.2±1.0                  | 7.23±1.0                   | 7.18±1.0                       | 0.50    |
| HbA <sub>1c</sub> (mmol/mol)       | 55.1±10.5                | 55.55±10.9                 | 55.01±10.4                     | 0.50    |
| Total cholesterol (mg/dl)          | 161.5±32.8               | 160.4±33.5                 | 161.8±32.6                     | 0.57    |
| LDL cholesterol (mg/dl)            | 81.0±23.8                | 82.02±23.1                 | 80.72±24.0                     | 0.48    |
| HDL cholesterol (mg/dl)            | 65.3±19.9                | 62.8±20.6                  | 66.1±19.7                      | 0.03    |
| Triglycerides (mg/dl)              | 74.7±37.2                | 76.01±36.7                 | 74.3±37.3                      | 0.56    |
| eGFR (ml/min/1.73 m <sup>2</sup> ) | 69.8±20.2                | 65.8±24.1                  | 70.9±18.9                      | 0.004   |
| ACR (ug/mg)                        | 12.1 (6.8-33.9)          | 12 (7.6-29.0)              | 13 (6.6-36.0)                  | 0.67    |
| Systolic BP (mmHg)                 | 132.2±16.9               | 132.3±18.2                 | 132.2±16.6                     | 0.94    |
| Diastolic BP (mmHg)                | 64.2±8.5                 | 63.1±8.0                   | 64.4±8.7                       | 0.07    |
| CVD, %                             | 40                       | 42                         | 39                             | 0.38    |
| PDR, %                             | 53                       | 55                         | 53                             | 0.59    |
| Neuropathy (MNSI≥2), %             | 70                       | 70                         | 70                             | 0.94    |
| Detectable c-peptide, %            | 33                       | 44                         | 30                             | <.001   |
| Hypertensive Medication, %         | 65                       | 64                         | 66                             | 0.59    |
| Lipid lowering medication, %       | 70                       | 66                         | 71                             | 0.17    |
| Exercise, %                        | 80                       | 78                         | 80                             | 0.49    |

P-values between those with and without Metabolomic data. Data are mean±SD or median (IQR) for continuous variables or % for categorical variables where noted. eGFR; estimated glomerular filtration rate, ACR; albumin-to-creatinine ratio; BP; blood pressure, CVD cardiovascular disease, PDR; proliferative diabetic retinopathy.



SUPPLEMENTARY DATA

Supplementary Table S9. Clinical characteristics of Joslin Medalists for Metabolomic analysis.

| Characteristic                     | CKD +ve (N=57) | CKD -ve (N=157) | P-value |
|------------------------------------|----------------|-----------------|---------|
| Male, %                            | 61             | 54              | 0.34    |
| Age (Years)                        | 65.5±7.8       | 68.7±7.8        | 0.01    |
| Duration (Years)                   | 55.7 ±6.2      | 55.1±6.6        | 0.48    |
| BMI (kg/m <sup>2</sup> )           | 27.3±3.8       | 25.8±4.3        | 0.02    |
| Insulin dose (units/kg)            | 0.43±0.2       | 0.47±0.2        | 0.27    |
| HbA <sub>1c</sub> (%)              | 6.7±0.9        | 7.41±1.0        | <0.001  |
| HbA <sub>1c</sub> (mmol/mol)       | 50.0±39.6      | 57.5±10.7       | <0.001  |
| Total cholesterol (mg/dl)          | 153.9±37.1     | 162.7±31.9      | 0.09    |
| LDL cholesterol (mg/dl)            | 78.0 ±24.2     | 83.5±22.7       | 0.13    |
| HDL cholesterol (mg/dl)            | 57.0±19.7      | 64.8±20.7       | 0.01    |
| Triglycerides (mg/dl)              | 87.6±38.2      | 71.6±35.4       | 0.01    |
| eGFR (ml/min/1.73 m <sup>2</sup> ) | 34.1±9.62      | 76.9±16.6       | <0.001  |
| ACR (ug/mg)*                       | 24.0 (11-101)  | 10.7 (6.0-18.8) | <0.001  |
| Systolic BP (mmHg)                 | 134.3±20.7     | 131.6±17.3      | 0.37    |
| Diastolic BP (mmHg)                | 62.9±8.0       | 63.2±7.99       | 0.79    |
| CVD, %                             | 61             | 36              | 0.001   |
| PDR, %                             | 68             | 50              | 0.04    |
| Neuropathy (MNSI≥2), %             | 61             | 74              | 0.09    |
| Detectable c-peptide, %            | 38             | 46              | 0.31    |
| Hypertensive Medication, %         | 79             | 57              | 0.001   |
| Lipid lowering medication, %       | 71             | 64              | 0.29    |
| Exercise, %                        | 72             | 80              | 0.21    |

Data are mean±SD or median (IQR) for continuous variables or % for categorical variables where noted. eGFR; estimated glomerular filtration rate, ACR; albumin-to-creatinine ratio; BP; blood pressure, CVD cardiovascular disease, PDR; proliferative diabetic retinopathy. CKD refers to Chronic kidney Disease Stage 3b, as defined by CKD-EPI eGFR<45 ml/min/1.73 m<sup>2</sup>.

SUPPLEMENTARY DATA

Supplementary Table S10. Up- and downregulated metabolites in the plasma from Joslin Medalist CKD Protected vs. Non-protected – un-adjusted and adjusted analyses.

| Metabolite                               | Unadjusted |          |          | Adjusted* |          |          |
|------------------------------------------|------------|----------|----------|-----------|----------|----------|
|                                          | FC         | p        | FDR      | FC        | p        | FDR      |
| glucuronate                              | -2.32      | 1.4E-24  | 8.13E-23 | -1.86     | 5.16E-12 | 7.49E-11 |
| xanthurenate                             | -1.82      | 5.04E-22 | 1.46E-20 | -1.73     | 2.11E-14 | 1.23E-12 |
| quinolinate                              | -2.23      | 8.88E-20 | 1.72E-18 | -1.83     | 8.01E-11 | 9.29E-10 |
| thymine                                  | -1.37      | 1.22E-15 | 1.76E-14 | -1.35     | 3.68E-12 | 7.12E-11 |
| hypoxanthine                             | -1.61      | 1.18E-14 | 1.37E-13 | -1.58     | 2.51E-12 | 7.12E-11 |
| urate                                    | -1.23      | 8.12E-14 | 7.85E-13 | -1.19     | 1.28E-08 | 1.23E-07 |
| inositol                                 | -1.6       | 3.34E-12 | 2.77E-11 | -1.41     | 3.12E-06 | 1.39E-05 |
| homovanillate                            | -1.51      | 5.43E-12 | 3.94E-11 | -1.44     | 1.28E-07 | 1.06E-06 |
| oxalate                                  | -1.35      | 2.17E-11 | 1.4E-10  | -1.26     | 9.52E-07 | 5.02E-06 |
| sorbitol                                 | -2.55      | 6.41E-11 | 3.72E-10 | -2.33     | 2.72E-07 | 1.97E-06 |
| suberate                                 | -1.29      | 1.95E-10 | 1.03E-09 | -1.25     | 1.81E-06 | 8.75E-06 |
| indolelactate                            | -1.51      | 2.68E-10 | 1.29E-09 | -1.45     | 5.29E-07 | 3.41E-06 |
| indoxylsulfate                           | -1.87      | 9.57E-10 | 4.27E-09 | -1.79     | 6.53E-07 | 3.79E-06 |
| hydroxyphenylacetate                     | -3.19      | 9.13E-09 | 3.78E-08 | -2.68     | 1.16E-05 | 4.81E-05 |
| 4-pyridoxate                             | -4.31      | 4.96E-08 | 1.92E-07 | -3.22     | 8.73E-05 | 0.000337 |
| sebacate                                 | -1.35      | 9.56E-08 | 3.47E-07 | -1.25     | 0.000379 | 0.00129  |
| adenine                                  | -2.74      | 3.41E-07 | 1.16E-06 | -2.21     | 0.000167 | 0.000607 |
| lactose                                  | -1.77      | 4.94E-07 | 1.59E-06 | -1.49     | 0.00183  | 0.00531  |
| sucrose                                  | -1.75      | 7.3E-07  | 2.23E-06 | -1.44     | 0.00292  | 0.00807  |
| 3-methyladipate/pimelate                 | -1.11      | 1.03E-05 | 2.98E-05 | -1.1      | 0.000747 | 0.00228  |
| pantothenate                             | -1.76      | 1.18E-05 | 3.25E-05 | -1.68     | 0.000468 | 0.00151  |
| hippurate                                | -1.72      | 1.85E-05 | 4.87E-05 | -1.37     | 0.0416   | 0.0805   |
| 4-hydroxymandelate                       | -1.43      | 5.62E-05 | 0.000142 | -1.19     | 0.0806   | 0.142    |
| homogentisate                            | -1.42      | 7.09E-05 | 0.000171 | -1.18     | 0.0971   | 0.152    |
| fumarate/maleate                         | -1.19      | 0.000278 | 0.000645 | -1.15     | 0.00913  | 0.0241   |
| aconitate                                | -1.17      | 0.000405 | 0.000903 | -1.11     | 0.0365   | 0.0756   |
| salicylurate                             | -3.64      | 0.00049  | 0.00105  | -2.05     | 0.0946   | 0.152    |
| ADP                                      | 1.59       | 0.000599 | 0.00124  | 1.33      | 0.0483   | 0.0903   |
| 4-hydroxybenzaldehyde                    | -1.55      | 0.00152  | 0.00304  | -1.47     | 0.0139   | 0.0321   |
| adipate                                  | -1.16      | 0.00555  | 0.0107   | -1.11     | 0.143    | 0.208    |
| 2-hydroxyglutarate                       | -1.08      | 0.00651  | 0.0122   | -1.05     | 0.181    | 0.25     |
| orotate                                  | -1.58      | 0.00754  | 0.0137   | -1.44     | 0.096    | 0.152    |
| taurodeoxycholate/taurochenodeoxycholate | -2.36      | 0.0078   | 0.0137   | -1.11     | 0.773    | 0.815    |
| GDP                                      | 1.69       | 0.0124   | 0.0211   | 1.32      | 0.2      | 0.264    |
| uridine                                  | 1.13       | 0.0325   | 0.0539   | 1.01      | 0.836    | 0.866    |
| pyruvate                                 | 1.29       | 0.0358   | 0.0578   | 1.47      | 0.00995  | 0.0251   |
| uracil                                   | 1.13       | 0.0574   | 0.09     | 1.03      | 0.751    | 0.807    |
| 2-aminoadipate                           | -1.15      | 0.0597   | 0.0911   | -1.18     | 0.0398   | 0.0795   |
| 3-hydroxybenzoate                        | -2.08      | 0.0643   | 0.0957   | -1.23     | 0.655    | 0.73     |
| indole-3-propionate                      | -1.23      | 0.0877   | 0.127    | -1.27     | 0.0908   | 0.152    |
| gentisate                                | -1.3       | 0.117    | 0.166    | -1.08     | 0.678    | 0.741    |
| citrate                                  | -1.06      | 0.157    | 0.216    | -1        | 0.964    | 0.964    |
| succinate                                | -1.04      | 0.221    | 0.298    | -1.09     | 0.0235   | 0.0525   |

SUPPLEMENTARY DATA

|                                          |       |       |       |       |        |        |
|------------------------------------------|-------|-------|-------|-------|--------|--------|
| alpha-hydroxybutyrate                    | -1.13 | 0.24  | 0.303 | -1.31 | 0.0256 | 0.0551 |
| IMP                                      | 1.36  | 0.239 | 0.303 | -1.16 | 0.577  | 0.657  |
| alpha-ketoglutarate                      | 1.11  | 0.231 | 0.303 | 1.29  | 0.0138 | 0.0321 |
| lactate                                  | 1.06  | 0.401 | 0.495 | 1.13  | 0.117  | 0.174  |
| AMP                                      | 1.1   | 0.517 | 0.624 | -1.12 | 0.429  | 0.529  |
| fructose/glucose/galactose               | -1.03 | 0.643 | 0.761 | -1.04 | 0.462  | 0.559  |
| xanthine                                 | 1.02  | 0.794 | 0.921 | 1.01  | 0.87   | 0.886  |
| glycocholate                             | -1.05 | 0.836 | 0.931 | 1.18  | 0.504  | 0.597  |
| PEP                                      | 1.05  | 0.851 | 0.931 | -1.3  | 0.358  | 0.452  |
| phosphoglycerate                         | 1.04  | 0.82  | 0.931 | -1.34 | 0.101  | 0.155  |
| chenodeoxycholate/deoxycholate           | 1.04  | 0.889 | 0.955 | 1.43  | 0.227  | 0.292  |
| hexose monophosphate                     | 1     | 0.984 | 0.994 | -1.23 | 0.191  | 0.258  |
| malate                                   | -1    | 0.994 | 0.994 | 1.06  | 0.531  | 0.616  |
| 2-phosphoglycerate                       | -1.01 | 0.955 | 0.994 | -1.36 | 0.0748 | 0.136  |
| glycodeoxycholate/glycochenodeoxycholate | 1     | 0.976 | 0.994 | 1.28  | 0.176  | 0.248  |

P: p-value, FDR: False Discovery Rate, FC: Fold Change. CKD refers to Chronic kidney Disease Stage 3b, as defined by CKD-EPI eGFR<45 ml/min/1.73 m<sup>2</sup>.

\*Adjusted analyses included covariates for age, BMI, HbA1c, HDL, triglycerides, and hypertensive medications.

SUPPLEMENTARY DATA

Supplementary Table S11. Baseline clinical characteristics of Joslin Medalists whose samples were used to replicate and validate TNFR1 and TNFR2 by ELISAs.

| Characteristic                     | ELISA Replication | SOMAscan        |
|------------------------------------|-------------------|-----------------|
|                                    | N=30              | N=181           |
| Male, N (%)                        | 16 (53.33)        | 92 (50.83)      |
| Age (years)                        | 73.20 (9.17)      | 66.73 (7.55)    |
| Duration (years)                   | 65.10 (10.32)     | 55.40 (6.20)    |
| BMI (kg/m <sup>2</sup> )           | 26.79 (5.05)      | 27.18 (5.20)    |
| Dose (kg)                          | 0.46 (0.19)       | 0.46 (0.16)     |
| HbA1c (mmol/mol)                   | 57.09 (10.77)     | 58.17 (99.53)   |
| HbA1c(%)                           | 7.37 (0.98)       | 7.47 (0.87)     |
| Total Cholesterol (mg/mmol)        | 3.99 (0.74)       | 4.19 (0.91)     |
| Total Cholesterol (mg/dL)          | 154.00 (28.48)    | 161.64 (34.96)  |
| LDLc (mmol/L)                      | 2.05 (0.50)       | 2.14 (0.66)     |
| LDLc (mg/dL)                       | 79.25 (19.29)     | 82.75 (25.47)   |
| HDLc (mmol/L)                      | 1.52 (0.45)       | 1.61 (0.56)     |
| HDLc (mg/dL)                       | 58.600 (17.38)    | 62.37 (21.56)   |
| Triglycerides (mg/dL)              | 0.91 (0.45)       | 0.93 (0.50)     |
| Triglycerides (mmol/L)             | 80.67 (39.80)     | 82.61 (44.08)   |
| eGFR (ml/min/1.73 m <sup>2</sup> ) | 48.50 (20.39)     | 58.20 (24.11)   |
| ACR (ug/mg)                        | 15.07 (26.51)     | 13.18 (51.15)   |
| ACR (mg/mmol)                      | 133.26 (234.33)   | 116.51 (452.14) |
| Systolic BP (mmHg)                 | 132.91 (22.49)    | 132.31 (17.43)  |
| Diastolic BP (mmHg)                | 61.23 (8.99)      | 63.25 (8.43)    |
| Nephropathy, N (%)                 | 14 (46.67)        | 84 (46.41)      |
| CVD, N (%)                         | 22 (75.86)        | 87 (49.71)      |
| PDR, N (%)                         | 11 (57.89)        | 88 (61.97)      |
| Neuropathy, N (%)                  | 20 (74.07)        | 127 (74.71)     |
| Detectable C-peptide, N (%)        | 13 (43.33)        | 76 (42.70)      |
| Hypertensive Medication, N (%)     | 20 (68.97)        | 122 (69.71)     |
| Lipid Lowering Medication, N (%)   | 20 (66.67)        | 128 (73.14)     |
| Exercise*, N (%)                   | 16 (55.17)        | 129 (73.30)     |

Data are mean±SD or median (IQR) for continuous variables or % for categorical variables where noted; eGFR: estimated glomerular filtration rate, ACR: albumin-to-creatinine ratio; BP: blood pressure, CVD: cardiovascular disease, PDR: proliferative diabetic retinopathy. \*p<0.05 for difference between the groups.

SUPPLEMENTARY DATA

Supplementary Table S12. Correlation of TNF receptors with glycolytic enzymes

| Enzyme              | Correlation with TNF1          |             | Correlation with TNF2          |             |
|---------------------|--------------------------------|-------------|--------------------------------|-------------|
|                     | <i>Correlation coefficient</i> | <i>P</i>    | <i>Correlation coefficient</i> | <i>P</i>    |
| TPI1                | -0.32                          | 0.31        | -0.47                          | 0.12        |
| LDHB                | -0.12                          | 0.70        | -0.29                          | 0.36        |
| MDH1                | -0.23                          | 0.47        | -0.35                          | 0.27        |
| <b>PKM2</b>         | <b>-0.63</b>                   | <b>0.03</b> | <b>-0.66</b>                   | <b>0.02</b> |
| PGAM1               | -0.42                          | 0.18        | -0.35                          | 0.27        |
| <b>Cytochrome C</b> | <b>-0.59</b>                   | <b>0.05</b> | <b>-0.69</b>                   | <b>0.01</b> |
| GAPDH               | -0.39                          | 0.21        | -0.48                          | 0.12        |

SUPPLEMENTARY DATA

Supplementary Table S13. Clinical characteristics of Joslin Medalists whose samples were used to replicate and validate APP by ELISAs.

| Characteristic                          | ELISA<br>N=40  | SOMAscan<br>N=181 |
|-----------------------------------------|----------------|-------------------|
| Male, <i>N</i> (%)                      | 13 (32.50)     | 92 (50.83)        |
| Age (years)                             | 67.1 (7.23)    | 66.73 (7.55)      |
| Duration (years)                        | 55.08 (6.14)   | 55.40 (6.20)      |
| BMI (kg/m <sup>2</sup> )                | 25.58 (4.06)   | 27.18 (5.20)      |
| HbA1c (%)                               | 7.16 (1.12)    | 7.47 (0.87)       |
| HbA1c (mmol/mol)                        | 54.70 (12.27)  | 58.17 (99.53)     |
| LDLc (mg/dL)                            | 74 (20.96)     | 82.75 (25.47)     |
| LDLc (mmol/L)                           | 1.92 (0.54)    | 2.14 (0.66)       |
| HDLc (mg/dL)                            | 63.85 (18.97)  | 62.37 (21.56)     |
| HDLc (mmol/L)                           | 1.6 (0.49)     | 1.61 (0.56)       |
| Triglycerides (mg/dL)                   | 75.85 (30.91)  | 82.61 (44.08)     |
| Triglycerides (mmol/L)                  | 0.86 (0.35)    | 0.93 (0.50)       |
| Systolic BP (mmHg)                      | 129.90 (17.11) | 132.31 (17.43)    |
| Diastolic BP (mmHg)                     | 62.61 (9.95)   | 63.25 (8.43)      |
| ACR (ug/mg)                             | 78.30 (155.15) | 116.51 (452.14)   |
| ACR (mg/mmol)                           | 8.86 (17.55)   | 13.18 (51.15)     |
| Total Cholesterol (mg/dL)               | 153.53 (31.70) | 161.64 (34.96)    |
| Total Cholesterol (mmol/L)              | 3.97 (0.82)    | 4.19 (0.91)       |
| Insulin dose (kg)                       | 0.44 (0.14)    | 0.46 (0.16)       |
| eGFR (mL/min per 1.73m <sup>2</sup> )   | 58.04 (24.76)  | 58.20 (24.11)     |
| Nephropathy, <i>N</i> (%)               | 20 (50.00)     | 84 (46.41)        |
| Lipid Lowering Medication, <i>N</i> (%) | 34 (85.00)     | 128 (73.14)       |
| Hypertensive Medication, <i>N</i> (%)   | 29 (74.36)     | 122 (69.71)       |
| Detectable C-peptide, <i>N</i> (%)      | 14 (35.00)     | 76 (42.70)        |
| CVD, <i>N</i> (%)                       | 19 (47.50)     | 87 (49.71)        |
| PDR, <i>N</i> (%)                       | 19 (51.35)     | 88 (61.97)        |
| Neuropathy, <i>N</i> (%)                | 30 (78.95)     | 127 (74.71)       |
| Exercise, <i>N</i> (%)                  | 29 (74.36)     | 129 (73.30)       |

Data are mean±SD or median (IQR) for continuous variables or *N* (%) for categorical variables where noted. eGFR; estimated glomerular filtration rate, ACR; albumin-to-creatinine ratio; BP; blood pressure, CVD cardiovascular disease, PDR; proliferative diabetic retinopathy. \**p*<0.05 for difference between the groups.

SUPPLEMENTARY DATA

Supplementary Table S14. Examining APP (ELISA) relationship to sample characteristics (N=159).

| <b>Characteristic</b>                        | <b>Correlation coefficient</b> | <b>P-value</b> |
|----------------------------------------------|--------------------------------|----------------|
| Sex*                                         | 0.94                           | 0.13           |
| Duration (years)                             | -0.07                          | 0.4            |
| Age (Baseline)                               | -0.13                          | 0.11           |
| Insulin dose (kg)                            | 0.16                           | 0.06           |
| <i>BMI</i> (kg/m <sup>2</sup> )              | 0.22                           | 0.01           |
| HbA1c (%)                                    | 0.07                           | 0.35           |
| LDLc (mg/dL)                                 | -0.01                          | 0.99           |
| Total Cholesterol (mg/dL)                    | -0.01                          | 0.86           |
| Triglycerides (mg/dL)                        | -0.13                          | 0.11           |
| HDLc (mg/dL)                                 | 0.02                           | 0.83           |
| <i>eGFR</i> (mL/min per 1.73m <sup>2</sup> ) | 0.32                           | <.0001         |
| ACR(ug/mg)                                   | -0.16                          | 0.06           |
| Systolic BP (mmHg)                           | 0.01                           | 0.89           |
| Diastolic BP (mmHg)                          | 0.03                           | 0.72           |
| Lipid Lowering Medication*                   | 0.68                           | 0.45           |
| Hypertensive Medication*                     | 1.16                           | 0.14           |
| Detectable C-peptide*                        | -0.94                          | 0.2            |
| <i>CVD</i> *                                 | 1.56                           | 0.02           |
| <i>PDR</i> *                                 | 2.25                           | <0.01          |
| Nephropathy*                                 | 2.89                           | <0.01          |
| Neuropathy*                                  | 0.12                           | 0.9            |

\*mean difference and p-value from t-test

SUPPLEMENTARY DATA

Supplementary Table S15. Association between APP (ELISA) and Diabetic complications in the Medalists (N=159)

| <b>Outcome</b>       | <b>Regression Estimate (95% CI)*</b> | <b>P-value</b>   |
|----------------------|--------------------------------------|------------------|
| <b>No PDR vs PDR</b> | <b>2.06 (0.55, 3.58)</b>             | <b>0.01</b>      |
| No CVD vs CVD        | 1.25 (-0.22, 2.72)                   | 0.09             |
| <b>No CKD vs CKD</b> | <b>3.28 (1.84, 4.72)</b>             | <b>&lt;.0001</b> |
| No DPN vs DPN        | -0.15 (-2.03, 1.73)                  | 0.88             |

PDR=Proliferative diabetic retinopathy; CVD=Cardiovascular disease; CKD= Chronic kidney Disease Stage 3b, as defined by eGFR<45 ml/min/1.73 m<sup>2</sup>; DPN=diabetic peripheral neuropathy;

\*model adjusted for age, sex, BMI, insulin dose.



SUPPLEMENTARY DATA

Supplementary Table S16. Correlation of APP (ELISA) with glycolytic enzymes [N=159]

| Glycolytic enzyme | Pearson correlation coefficient | P value       |
|-------------------|---------------------------------|---------------|
| TPI1              | 0.15995                         | 0.0823        |
| <b>LDHB</b>       | <b>0.19756</b>                  | <b>0.0313</b> |
| <b>MDH1</b>       | <b>0.17042</b>                  | <b>0.0639</b> |
| PKM2              | 0.06181                         | 0.5042        |
| PGAM1             | 0.02971                         | 0.7484        |
| Cytochrome C      | -0.10683                        | 0.2475        |
| GAPDH             | 0.08753                         | 0.3438        |

SUPPLEMENTARY DATA

Supplementary Table S17. Pro-thrombotic Somalogic proteins that significantly correlated with APP, and their associations with CKD and PDR

| Protein      | Correlation with APP ELISA     |             | No CKD vs. CKD     |                | No PDR vs. PDR     |               |
|--------------|--------------------------------|-------------|--------------------|----------------|--------------------|---------------|
|              | <i>Correlation coefficient</i> | <i>P</i>    | <i>Fold change</i> | <i>P</i>       | <i>Fold change</i> | <i>P</i>      |
| THBS2        | -0.19                          | 0.04        | -1.48              | 1.5E-07        | -1.13              | 0.17          |
| <b>THBS4</b> | <b>-0.25</b>                   | <b>0.01</b> | <b>-1.21</b>       | <b>7.7E-07</b> | <b>-1.15</b>       | <b>0.0019</b> |
| TF           | -0.18                          | 0.05        | -1.48              | 1.2E-09        | -1.12              | 0.14          |
| C5           | 0.19                           | 0.04        | 1.02               | 0.38           | -1.00              | 0.95          |
| GP6          | 0.18                           | 0.05        | 1.36               | 3.1E-05        | 1.01               | 0.88          |

THBS2=Thrombospondin-2; THBS4=Thrombospondin-4; TF=Tissue factor; C5=Complement C5; GP6=Platelet glycoprotein VI. CKD refers to Chronic kidney Disease Stage 3b, as defined by eGFR<45 ml/min/1.73 m<sup>2</sup>. PDR=Proliferative diabetic retinopathy.

SUPPLEMENTARY DATA

Supplementary Figure S1. Flowchart of Study Design and Subsets

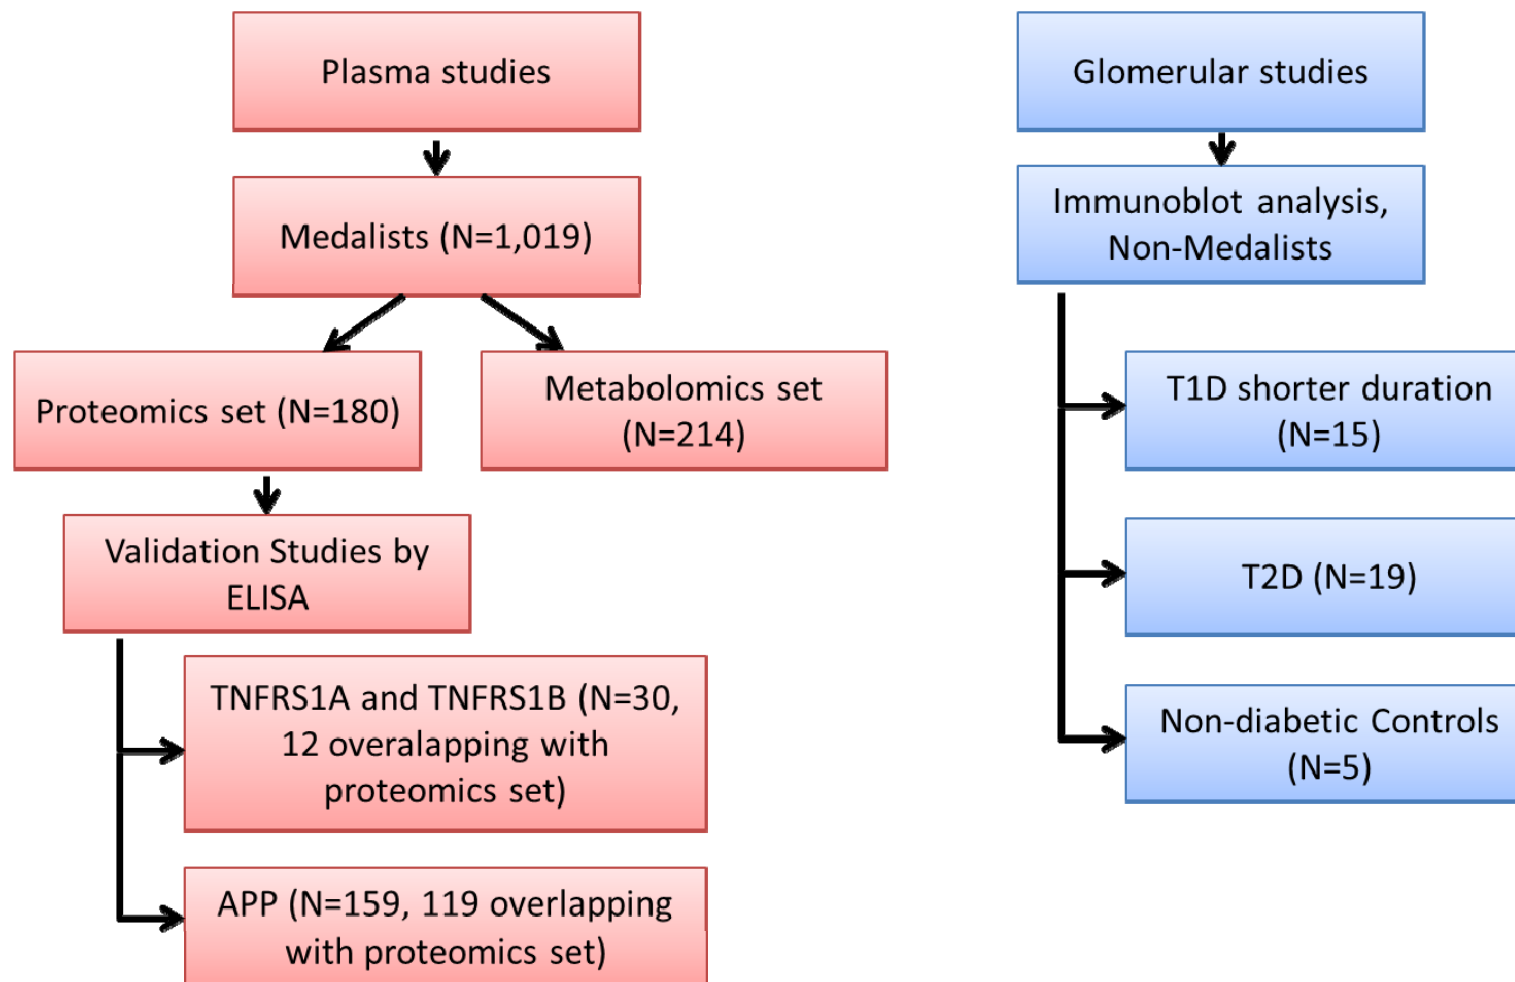

SUPPLEMENTARY DATA

Supplementary Figure S2. Sensitivity and specificity of Human plasma APP ELISA. A) Standard Curve  
B) Quantification of various validating samples

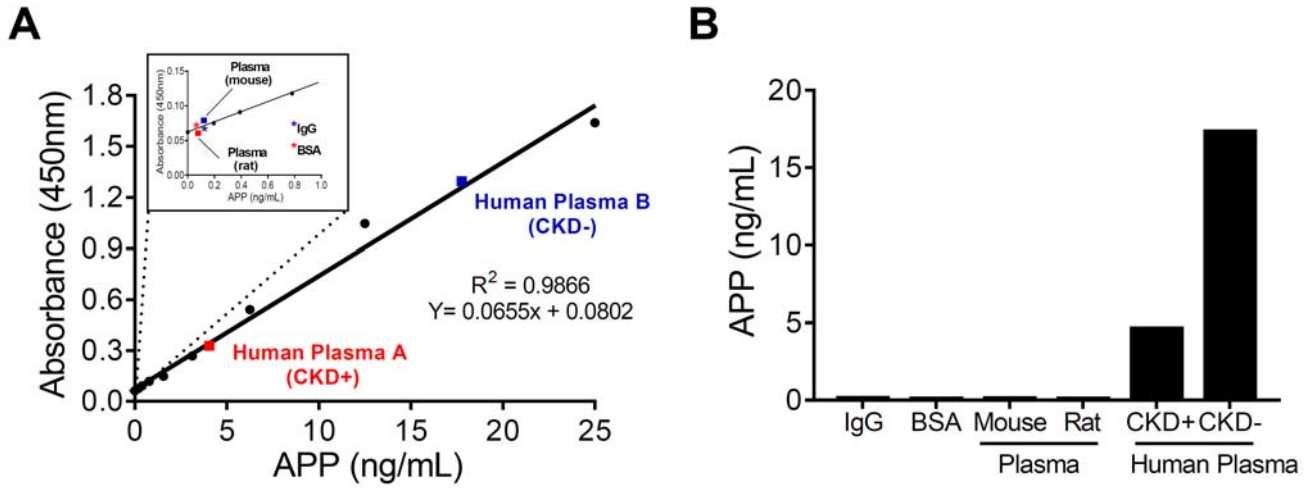

\*CKD=Chronic kidney disease (diabetic nephropathy)

SUPPLEMENTARY DATA

Supplementary Figure S3. APP ELISA measurements in DN and no DN among 119 Medalists overlapping with SOMAscan samples [Validation Set]  
CKD refers to Chronic kidney Disease Stage 3b, as defined by  $eGFR < 45 \text{ ml/min/1.73 m}^2$

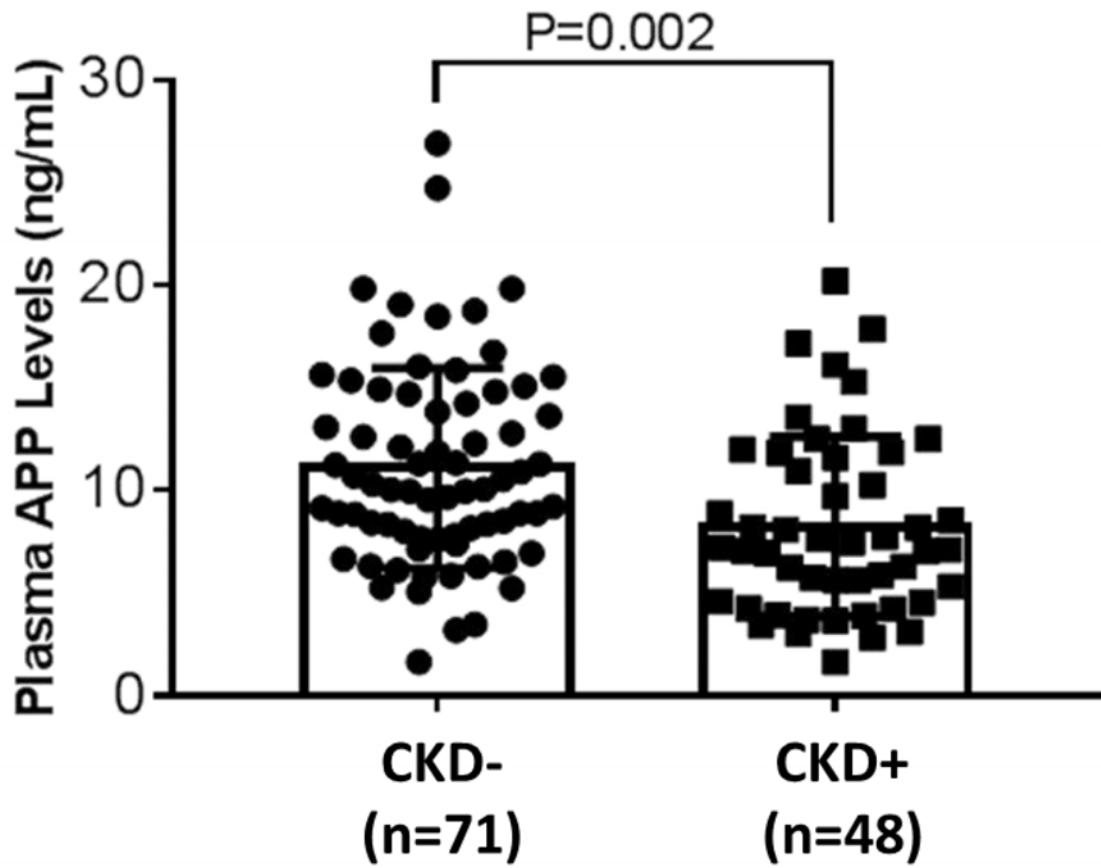

SUPPLEMENTARY DATA

Supplementary Figure S4. Correlations between APP and TNF receptors (ELISA) (N=13).

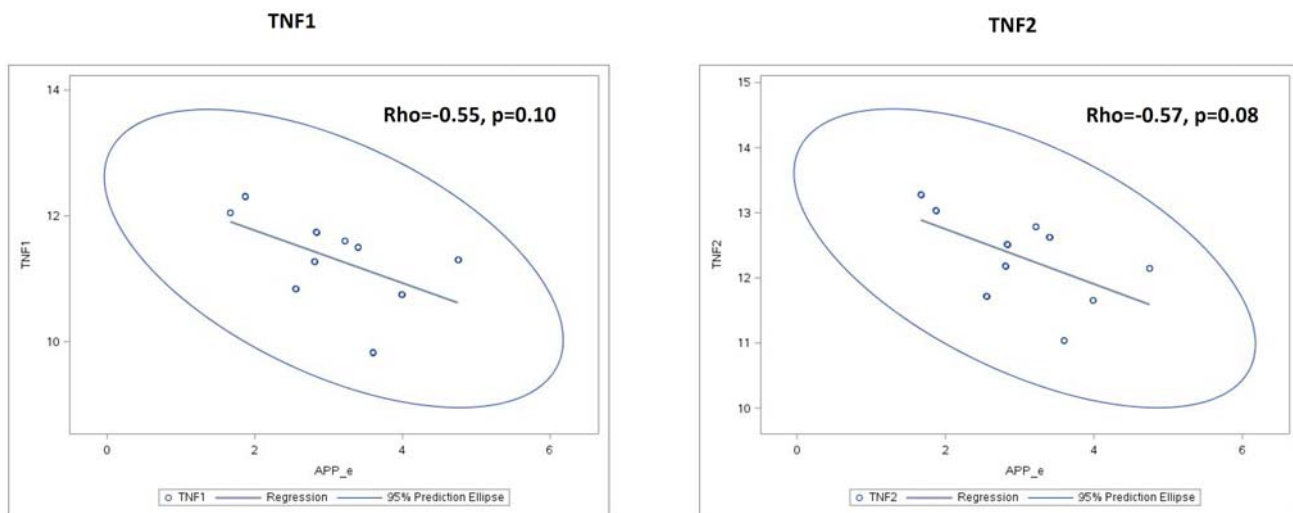

Supplement: dc182585supplementarydata.pdf [file dc182585supplementarydata.pdf]
